# Supplementary material for: Surface acoustic wave-assisted swing-angle spray: from mechanism investigation to deposition characteristics and in vivo wound healing
Source: Royal Society of Chemistry journal article supplement (doi:10.1039/d5lc00964b), 2025-12-16
Supplement: d5lc00964b1.xlsx [file d5lc00964b1.xlsx]

## Sheet: 实验
Timestamp	ImageName	DV10 (µm)	VMD (µm)	DV90 (µm)	NMD (µm)	Spectrum	Total	Coverage	Deposits/cm²	Region Area (cm²)	µL/cm²
0度-10dbm-1.5cm
2025-07-11 12:04:44	灰度-0--10dbm-1.5cm	69.77	92.31	2290.99	107.096	24.0626	180	4.43%	14.4012	12.4989	0.545959
2025-07-11 12:04:58	灰度-0--10dbm-1.5cm	69.77	132.05	2142.08	130.547	15.6934	82	3.36%	6.56056	12.4989	0.417729
2025-07-11 12:05:11	灰度-0--10dbm-1.5cm	73.15	128.26	2062.55	131.474	15.5107	68	3.01%	5.44046	12.4989	0.371805
2025-07-11 12:05:36	灰度-0--10dbm-1.5cm	76.32	104.87	3229.84	117.438	30.0708	165	7.88%	13.2011	12.4989	1.4194
2025-07-11 12:06:24	灰度-0--10dbm-1.5cm	66.16	116.88	2424.33	135.23	20.176	50	4.01%	4.00034	12.4989	0.598651
2025-07-11 12:06:47	灰度-0--10dbm-1.5cm	69.77	113.68	3199.22	127.96	27.5286	95	7.48%	7.60065	12.4989	1.37592
2025-07-11 12:08:20	灰度-0--10dbm-1.5cm	69.77	98.91	3400.66	106.592	33.676	274	9.08%	21.9219	12.4989	1.65959
2025-07-11 12:08:29	灰度-0--10dbm-1.5cm	73.15	110.3	3423.32	126.088	30.3733	123	8.78%	9.84084	12.4989	1.68685
2025-07-11 12:08:53	灰度-0--10dbm-1.5cm	76.32	110.3	3176.72	128.074	28.1088	99	7.42%	7.92068	12.4989	1.34785
2025-07-11 12:09:17	灰度-0--10dbm-1.5cm	69.77	108.54	2608.06	121.253	23.3858	102	4.94%	8.1607	12.4989	0.748461
2025-07-11 12:09:26	灰度-0--10dbm-1.5cm	79.32	146.16	2841.01	138.767	18.895	186	7.02%	14.8813	12.4989	0.994015
2025-07-11 12:10:05	灰度-0--10dbm-1.5cm	76.32	134.44	3270.82	131.19	23.7615	237	9.16%	18.9616	12.4989	1.49936
0度-10dbm-3cm
2025-07-11 12:39:25	灰度-0--10dbm-3cm	73.15	116.88	2000.48	116.45	16.4898	165	3.28%	13.2011	12.4989	0.347207
2025-07-11 12:40:00	灰度-0--10dbm-3cm	73.15	112.01	2076.48	128.498	17.8853	76	3.08%	6.08052	12.4989	0.380908
2025-07-11 12:40:13	灰度-0--10dbm-3cm	73.15	106.73	1913.97	114.957	17.2474	98	2.65%	7.84067	12.4989	0.298692
2025-07-11 12:40:26	灰度-0--10dbm-3cm	69.77	104.87	2672.43	117.993	24.818	125	5.28%	10.0009	12.4989	0.80608
2025-07-11 12:40:38	灰度-0--10dbm-3cm	73.15	108.54	2747.36	120.814	24.638	138	5.79%	11.0409	12.4989	0.884136
2025-07-11 12:40:49	灰度-0--10dbm-3cm	69.77	112.01	2992.14	120.744	26.0903	154	6.86%	12.3211	12.4989	1.13422
2025-07-11 12:41:00	灰度-0--10dbm-3cm	73.15	116.88	2680.05	117.912	22.3041	203	5.74%	16.2414	12.4989	0.820449
2025-07-11 12:41:18	灰度-0--10dbm-3cm	76.32	110.3	2721.08	115.052	23.9779	190	5.74%	15.2013	12.4989	0.855199
2025-07-11 12:41:23	灰度-0--10dbm-3cm	73.15	115.3	2580.63	120.313	21.7474	183	5.31%	14.6413	12.4989	0.734761
2025-07-11 12:41:28	灰度-0--10dbm-3cm	73.15	108.54	2213.09	113.164	19.7157	153	3.74%	12.241	12.4989	0.462245
2025-07-11 12:41:36	灰度-0--10dbm-3cm	73.15	126.95	316.95	122.401	1.92044	229	5.77%	18.3216	12.4989	0.731862
2025-07-11 12:41:43	灰度-0--10dbm-3cm	73.15	129.55	3754.74	125.944	28.4183	226	11.46%	18.0815	12.4989	2.23553
0度-10dbm-5cm
2025-07-11 12:45:31	灰度-0--10dbm-5cm	73.15	96.79	162.03	97.8567	0.918277	111	0.4%	8.88076	12.4989	0.00691092
2025-07-11 12:45:44	灰度-0--10dbm-5cm	69.77	96.79	200.59	102.039	1.35159	136	0.62%	10.8809	12.4989	0.0113001
2025-07-11 12:45:51	灰度-0--10dbm-5cm	73.15	104.87	199.43	106.166	1.20416	147	0.75%	11.761	12.4989	0.0130942
2025-07-11 12:46:05	灰度-0--10dbm-5cm	76.32	118.42	203.07	116.815	1.07034	271	1.75%	21.6819	12.4989	0.034688
2025-07-11 12:46:18	灰度-0--10dbm-5cm	73.15	108.54	195.74	109.265	1.12945	504	3.31%	40.3234	12.4989	0.123504
2025-07-11 12:46:24	灰度-0--10dbm-5cm	76.32	110.3	203.63	112.854	1.15422	490	5.31%	39.2033	12.4989	0.40961
2025-07-11 12:46:33	灰度-0--10dbm-5cm	76.32	119.92	342.55	118.877	2.22006	444	8.81%	35.523	12.4989	1.19264
2025-07-11 12:46:38	灰度-0--10dbm-5cm	76.32	125.6	423.97	123.008	2.76791	431	6.87%	34.4829	12.4989	0.659317
2025-07-11 12:46:45	灰度-0--10dbm-5cm	73.15	113.68	206.62	115.953	1.17409	387	6.7%	30.9626	12.4989	0.803939
0度-9dbm-1.5cm
2025-07-11 14:16:50	灰度-0--9dbm-1.5cm	73.15	113.68	312.11	116.027	2.10204	317	7.16%	25.3622	12.4989	0.993549
2025-07-11 14:17:13	灰度-0--9dbm-1.5cm	76.32	112.01	3299.58	126.835	28.7765	113	8.09%	9.04077	12.4989	1.51053
2025-07-11 14:17:19	灰度-0--9dbm-1.5cm	73.15	112.01	3278.7	121.116	28.6184	138	8.06%	11.0409	12.4989	1.48338
2025-07-11 14:17:29	灰度-0--9dbm-1.5cm	76.32	112.01	3215.05	129.155	28.0219	129	7.93%	10.3209	12.4989	1.40794
2025-07-11 14:17:40	灰度-0--9dbm-1.5cm	79.32	142.16	3238.86	146.329	22.2252	126	8.69%	10.0809	12.4989	1.47125
2025-07-11 14:17:46	灰度-0--9dbm-1.5cm	73.15	110.3	3196.86	125.885	28.3201	108	7.53%	8.64074	12.4989	1.3738
2025-07-11 14:19:12	灰度-0--9dbm-1.5cm	79.32	113.68	4471.84	121.825	38.6393	270	16.3%	21.6018	12.4989	3.76369
2025-07-11 14:19:57	灰度-0--9dbm-1.5cm	76.32	112.01	4391.23	123.138	38.5225	222	15.48%	17.7615	12.4989	3.5619
2025-07-11 14:20:02	灰度-0--9dbm-1.5cm	79.32	116.88	4348.68	123.166	36.5277	269	15.48%	21.5218	12.4989	3.46399
2025-07-11 14:20:23	灰度-0--9dbm-1.5cm	76.32	125.6	5146.74	123.795	40.3696	366	22.55%	29.2825	12.4989	5.74425
2025-07-11 14:20:29	灰度-0--9dbm-1.5cm	76.32	119.92	5588.99	129.842	45.9696	262	26.09%	20.9618	12.4989	7.33678
2025-07-11 14:20:35	灰度-0--9dbm-1.5cm	76.32	124.23	5589.58	137.956	44.3795	166	25.53%	13.2811	12.4989	7.32755
0度-9dbm-3cm
2025-07-11 14:26:09	灰度-0--9dbm-3cm	73.15	113.68	2779.8	122.707	23.8094	122	5.72%	9.76083	12.4989	0.906592
2025-07-11 14:26:15	灰度-0--9dbm-3cm	76.32	119.92	2327.6	131.146	18.7732	85	3.92%	6.80058	12.4989	0.533738
2025-07-11 14:26:25	灰度-0--9dbm-3cm	73.15	106.73	2182.94	115.822	19.7675	178	3.88%	14.2412	12.4989	0.45057
2025-07-11 14:26:30	灰度-0--9dbm-3cm	73.15	104.87	3152.48	115.488	29.3633	168	7.55%	13.4411	12.4989	1.32104
2025-07-11 14:26:35	灰度-0--9dbm-3cm	73.15	108.54	3265.98	119.384	29.4162	158	8.11%	12.6411	12.4989	1.46806
2025-07-11 14:26:39	灰度-0--9dbm-3cm	73.15	108.54	3117.82	120.49	28.0511	146	7.36%	11.681	12.4989	1.27873
2025-07-11 14:26:47	灰度-0--9dbm-3cm	73.15	108.54	4216.72	116.418	38.1755	237	14.07%	18.9616	12.4989	3.15278
2025-07-11 14:26:52	灰度-0--9dbm-3cm	73.15	106.73	3934.59	116.087	36.1795	239	12.41%	19.1216	12.4989	2.57154
2025-07-11 14:26:56	灰度-0--9dbm-3cm	73.15	112.01	4002.11	119.487	35.0769	206	12.59%	16.4814	12.4989	2.69691
2025-07-11 14:27:00	灰度-0--9dbm-3cm	69.77	108.54	3969.68	116.787	35.9306	226	12.45%	18.0815	12.4989	2.63307
2025-07-11 14:27:05	灰度-0--9dbm-3cm	73.15	104.87	4040.4	115.673	37.8302	226	12.89%	18.0815	12.4989	2.7751
2025-07-11 14:27:10	灰度-0--9dbm-3cm	73.15	115.3	4273.88	120.623	36.433	298	15.34%	23.842	12.4989	3.31611
0度-9dbm-5cm
2025-07-11 14:29:04	灰度-0--9dbm-5cm	69.77	102.95	185.26	103.817	1.12181	170	0.86%	13.6012	12.4989	0.0202335
2025-07-11 14:29:09	灰度-0--9dbm-5cm	69.77	96.79	140.06	95.4897	0.726211	125	0.4%	10.0009	12.4989	0.00576586
2025-07-11 14:29:14	灰度-0--9dbm-5cm	69.77	96.79	168.77	99.5857	1.02283	185	0.69%	14.8013	12.4989	0.0103174
2025-07-11 14:29:19	灰度-0--9dbm-5cm	69.77	102.95	184.42	104.628	1.11365	478	3.66%	38.2433	12.4989	0.22349
2025-07-11 14:29:24	灰度-0--9dbm-5cm	73.15	100.96	175.76	103.785	1.01634	212	1.06%	16.9614	12.4989	0.0261551
2025-07-11 14:29:28	灰度-0--9dbm-5cm	66.16	84.87	121.39	86.7291	0.65076	116	0.28%	9.28079	12.4989	0.0038356
2025-07-11 14:29:35	灰度-0--9dbm-5cm	73.15	98.91	2913.49	109.292	28.7164	260	6.81%	20.8018	12.4989	1.05136
2025-07-11 14:29:39	灰度-0--9dbm-5cm	69.77	104.87	202.49	107.583	1.26557	311	5.65%	24.8821	12.4989	0.737058
2025-07-11 14:29:43	灰度-0--9dbm-5cm	73.15	106.73	357.84	112.375	2.66738	287	6.28%	22.962	12.4989	0.870083
2025-07-11 14:29:48	灰度-0--9dbm-5cm	73.15	106.73	314.06	110.881	2.25719	294	8.27%	23.522	12.4989	1.37099
2025-07-11 14:29:54	灰度-0--9dbm-5cm	73.15	110.3	3407.14	117.707	30.2266	235	9.43%	18.8016	12.4989	1.68397
2025-07-11 14:30:00	灰度-0--9dbm-5cm	73.15	108.54	4054.98	114.142	36.6854	301	13.33%	24.0821	12.4989	2.81027
0度-8dbm-1.5cm
2025-07-11 14:37:07	灰度-0--8dbm-1.5cm	69.77	96.79	3287.34	104.514	33.2428	270	8.42%	21.6018	12.4989	1.4994
2025-07-11 14:37:12	灰度-0--8dbm-1.5cm	79.32	128.26	3351.89	146.449	25.5151	78	8.31%	6.24053	12.4989	1.5825
2025-07-11 14:37:17	灰度-0--8dbm-1.5cm	73.15	113.68	3235.4	128.534	27.8171	112	7.78%	8.96077	12.4989	1.42488
2025-07-11 14:37:25	灰度-0--8dbm-1.5cm	76.32	118.42	3814.41	128.979	31.5664	178	11.5%	14.2412	12.4989	2.33988
2025-07-11 14:37:29	灰度-0--8dbm-1.5cm	73.15	110.3	4056.79	120.853	36.1164	202	12.94%	16.1614	12.4989	2.80813
2025-07-11 14:37:39	灰度-0--8dbm-1.5cm	76.32	118.42	3892.27	131.56	32.2239	170	12.23%	13.6012	12.4989	2.51175
2025-07-11 14:37:46	灰度-0--8dbm-1.5cm	76.32	116.88	6158.93	125.869	52.0415	338	32.45%	27.0423	12.4989	9.81841
2025-07-11 14:37:52	灰度-0--8dbm-1.5cm	76.32	122.83	5722.44	131.749	45.9669	236	27.33%	18.8816	12.4989	7.87049
2025-07-11 14:37:58	灰度-0--8dbm-1.5cm	76.32	119.92	4895.88	127.23	40.1898	288	19.97%	23.042	12.4989	4.94329
2025-07-11 14:38:03	灰度-0--8dbm-1.5cm	76.32	126.95	5656.94	131.114	43.9592	268	26.78%	21.4418	12.4989	7.60497
2025-07-11 14:38:08	灰度-0--8dbm-1.5cm	76.32	130.81	5882.91	142.682	44.3895	173	28.64%	13.8412	12.4989	8.54552
2025-07-11 14:38:14	灰度-0--8dbm-1.5cm	73.15	115.3	5340.87	125.659	45.6871	232	23.38%	18.5616	12.4989	6.39647
0度-8dbm-3cm
2025-07-11 14:42:49	灰度-0--8dbm-3cm	73.15	118.42	3178.23	126.873	26.2209	115	7.5%	9.20079	12.4989	1.35111
2025-07-11 14:42:54	灰度-0--8dbm-3cm	73.15	115.3	3175.62	132.33	26.9078	91	7.38%	7.28062	12.4989	1.34611
2025-07-11 14:42:59	灰度-0--8dbm-3cm	73.15	119.92	3285.51	133.709	26.7875	90	7.94%	7.20061	12.4989	1.49034
2025-07-11 14:43:04	灰度-0--8dbm-3cm	73.15	119.92	3699.65	129.041	30.241	138	10.47%	11.0409	12.4989	2.12946
2025-07-11 14:43:08	灰度-0--8dbm-3cm	76.32	106.73	3893.38	124.971	35.7637	136	11.57%	10.8809	12.4989	2.47889
2025-07-11 14:43:21	灰度-0--8dbm-3cm	76.32	126.95	3940.22	138.75	30.4364	128	12.13%	10.2409	12.4989	2.57936
2025-07-11 14:43:29	灰度-0--8dbm-3cm	73.15	104.87	4406.53	118.046	41.3214	210	15.35%	16.8014	12.4989	3.59489
2025-07-11 14:43:34	灰度-0--8dbm-3cm	73.15	116.88	4498.73	128.417	37.8643	150	15.85%	12.001	12.4989	3.82193
2025-07-11 14:43:55	灰度-0--8dbm-3cm	76.32	130.81	4580.21	135.775	34.4308	217	17.42%	17.3615	12.4989	4.06196
2025-07-11 14:44:01	灰度-0--8dbm-3cm	73.15	121.39	4282.12	125.062	34.6731	311	15.7%	24.8821	12.4989	3.33665
2025-07-11 14:44:06	灰度-0--8dbm-3cm	73.15	126.95	4191.15	129.318	32.438	250	14.66%	20.0017	12.4989	3.11691
2025-07-11 14:44:12	灰度-0--8dbm-3cm	73.15	121.39	4200.06	123.387	33.9971	319	14.97%	25.5222	12.4989	3.14048
0度-8dbm-5cm
2025-07-11 14:47:26	灰度-0--8dbm-5cm	73.15	102.95	2785.56	107.954	26.3469	252	6.11%	20.1617	12.4989	0.917544
2025-07-11 14:47:34	灰度-0--8dbm-5cm	76.32	110.3	207.85	112.243	1.19248	231	1.71%	18.4816	12.4989	0.0606422
2025-07-11 14:47:41	灰度-0--8dbm-5cm	73.15	110.3	306.68	114.141	2.11723	183	2.54%	14.6413	12.4989	0.207993
2025-07-11 14:47:47	灰度-0--8dbm-5cm	73.15	106.73	3128.54	116.983	28.6273	196	7.71%	15.6813	12.4989	1.29871
2025-07-11 14:47:51	灰度-0--8dbm-5cm	76.32	115.3	3736.08	121.286	31.7412	174	10.79%	13.9212	12.4989	2.19413
2025-07-11 14:47:56	灰度-0--8dbm-5cm	73.15	108.54	4067.39	116.023	36.7997	243	13.1%	19.4417	12.4989	2.83154
2025-07-11 14:48:03	灰度-0--8dbm-5cm	69.77	104.87	4174.05	110.336	39.1368	339	14.21%	27.1223	12.4989	3.06479
2025-07-11 14:48:09	灰度-0--8dbm-5cm	69.77	106.73	4233.33	113.372	39.0102	248	14.24%	19.8417	12.4989	3.19176
2025-07-11 14:48:14	灰度-0--8dbm-5cm	73.15	112.01	4413.13	115.962	38.7464	324	16.06%	25.9222	12.4989	3.62159
2025-07-11 14:48:19	灰度-0--8dbm-5cm	76.32	122.83	3903.76	127.153	31.1605	221	12.35%	17.6815	12.4989	2.51214
2025-07-11 14:48:22	灰度-0--8dbm-5cm	73.15	118.42	3524.68	124.875	29.1465	188	9.85%	15.0413	12.4989	1.84969
2025-07-11 14:48:27	灰度-0--8dbm-5cm	69.77	112.01	4204.13	117.997	36.9106	268	14.32%	21.4418	12.4989	3.13071
0度-8dbm-7cm
2025-07-11 14:49:56	灰度-0--8dbm-7cm	73.15	116.88	320.29	114.777	2.11448	453	6.65%	36.2431	12.4989	0.707217
2025-07-11 14:50:01	灰度-0--8dbm-7cm	69.77	106.73	202.49	108.636	1.24351	491	10.44%	39.2834	12.4989	1.72125
2025-07-11 14:50:06	灰度-0--8dbm-7cm	73.15	113.68	384.36	114.744	2.7376	323	8.28%	25.8422	12.4989	1.30463
2025-07-11 14:50:11	灰度-0--8dbm-7cm	69.77	108.54	417.85	113.666	3.20693	366	9.48%	29.2825	12.4989	1.52395
2025-07-11 14:50:15	灰度-0--8dbm-7cm	73.15	113.68	298.04	114.051	1.97827	415	5.87%	33.2028	12.4989	0.596516
2025-07-11 14:50:20	灰度-0--8dbm-7cm	69.77	110.3	197.67	108.523	1.15956	557	3.66%	44.5638	12.4989	0.135386
0度-7dbm-1.5cm
2025-07-11 14:53:06	灰度-0--7dbm-1.5cm	73.15	137.87	3235.6	143.898	22.9379	128	8.61%	10.2409	12.4989	1.46107
2025-07-11 14:53:11	灰度-0--7dbm-1.5cm	82.16	168.14	3189.8	158.267	18.4825	101	8.04%	8.08069	12.4989	1.37923
2025-07-11 14:53:15	灰度-0--7dbm-1.5cm	84.87	167.5	3084.28	166.391	17.9069	90	7.52%	7.20061	12.4989	1.24957
2025-07-11 14:53:23	灰度-0--7dbm-1.5cm	79.32	141.12	4980.04	134.214	34.7273	279	20.89%	22.3219	12.4989	5.2
2025-07-11 14:53:27	灰度-0--7dbm-1.5cm	79.32	122.83	4896.33	133.534	39.2169	200	19.46%	16.0014	12.4989	4.93215
2025-07-11 14:53:32	灰度-0--7dbm-1.5cm	76.32	125.6	4574.6	128.326	35.8143	262	17.27%	20.9618	12.4989	4.03226
2025-07-11 14:53:43	灰度-0--7dbm-1.5cm	79.32	134.44	5928.01	136.239	43.5041	264	29.78%	21.1218	12.4989	8.75456
2025-07-11 14:53:48	灰度-0--7dbm-1.5cm	79.32	119.92	5956.55	129.916	49.0096	290	30.02%	23.202	12.4989	8.87961
2025-07-11 14:53:52	灰度-0--7dbm-1.5cm	79.32	124.23	5579.94	134.31	44.2777	276	26.38%	22.0819	12.4989	7.30975
2025-07-11 14:53:56	灰度-0--7dbm-1.5cm	79.32	125.6	5658.74	132.276	44.4221	259	26.75%	20.7218	12.4989	7.61019
2025-07-11 14:54:03	灰度-0--7dbm-1.5cm	96.79	184.84	1314.4	176.22	6.58737	369	27.94%	29.5225	12.4989	6.19074
2025-07-11 14:54:13	灰度-0--7dbm-1.5cm	84.87	163.45	5770.92	162.547	34.7877	238	29.13%	19.0416	12.4989	8.11077
0度-7dbm-3cm
2025-07-11 14:57:07	灰度-0--7dbm-3cm	76.32	166.19	3755.04	159.522	22.1356	110	11.18%	8.80075	12.4989	2.23598
2025-07-11 14:57:11	灰度-0--7dbm-3cm	82.16	152.55	3440	168.462	22.0114	81	9.14%	6.48055	12.4989	1.72167
2025-07-11 14:57:17	灰度-0--7dbm-3cm	76.32	149.9	3557.01	152.371	23.2201	94	9.71%	7.52064	12.4989	1.89769
2025-07-11 14:57:22	灰度-0--7dbm-3cm	69.77	98.91	4035.01	112.129	40.0894	226	12.81%	18.0815	12.4989	2.76326
2025-07-11 14:57:26	灰度-0--7dbm-3cm	69.77	104.87	4570.95	111.717	42.9215	307	16.96%	24.5621	12.4989	4.01678
2025-07-11 14:57:33	灰度-0--7dbm-3cm	69.77	108.54	4679.23	113.068	42.4678	299	17.86%	23.922	12.4989	4.30871
2025-07-11 14:57:38	灰度-0--7dbm-3cm	76.32	130.81	4545.34	129.032	34.1642	300	17.51%	24.002	12.4989	3.96599
2025-07-11 14:57:43	灰度-0--7dbm-3cm	69.77	122.83	4184.87	122.497	33.5024	284	14.6%	22.7219	12.4989	3.09617
2025-07-11 14:57:48	灰度-0--7dbm-3cm	73.15	129.55	4564.68	129.838	34.6702	259	17.32%	20.7218	12.4989	4.0085
2025-07-11 14:57:53	灰度-0--7dbm-3cm	76.32	106.73	5387.87	119.273	49.7662	280	23.89%	22.4019	12.4989	6.56741
2025-07-11 14:57:58	灰度-0--7dbm-3cm	76.32	116.88	5343.24	123.528	45.0626	260	23.44%	20.8018	12.4989	6.40584
2025-07-11 14:58:04	灰度-0--7dbm-3cm	76.32	115.3	5378.66	119.585	45.9873	313	23.97%	25.0421	12.4989	6.53682
0度-7dbm-5cm
2025-07-11 15:00:13	灰度-0--7dbm-5cm	73.15	110.3	3874.87	113.253	34.4671	284	12.09%	22.7219	12.4989	2.45388
2025-07-11 15:00:18	灰度-0--7dbm-5cm	73.15	108.54	3723.99	114.216	33.6359	262	11.05%	20.9618	12.4989	2.17808
2025-07-11 15:00:22	灰度-0--7dbm-5cm	69.77	108.54	3414.99	113.003	30.8202	243	9.19%	19.4417	12.4989	1.68157
2025-07-11 15:00:29	灰度-0--7dbm-5cm	69.77	106.73	660.5	111.218	5.53481	381	13.71%	30.4826	12.4989	2.77497
2025-07-11 15:00:35	灰度-0--7dbm-5cm	69.77	108.54	3717.45	112.49	33.6068	327	11.54%	26.1622	12.4989	2.18649
2025-07-11 15:00:40	灰度-0--7dbm-5cm	69.77	104.87	3532.44	109.771	33.0187	320	10.22%	25.6022	12.4989	1.86806
2025-07-11 15:00:44	灰度-0--7dbm-5cm	73.15	106.73	3237.47	112.155	29.6479	272	8.46%	21.7619	12.4989	1.43718
2025-07-11 15:00:48	灰度-0--7dbm-5cm	73.15	112.01	3951.38	118.44	34.624	211	12.24%	16.8814	12.4989	2.5958
2025-07-11 15:00:52	灰度-0--7dbm-5cm	73.15	108.54	4765.35	114.578	43.2301	282	18.4%	22.5619	12.4989	4.54803
2025-07-11 15:00:58	灰度-0--7dbm-5cm	69.77	108.54	5759.33	113.064	52.419	432	28.25%	34.563	12.4989	8.03258
2025-07-11 15:01:02	灰度-0--7dbm-5cm	73.15	110.3	5994.1	116.781	53.6804	416	30.71%	33.2828	12.4989	9.05104
2025-07-11 15:01:08	灰度-0--7dbm-5cm	73.15	104.87	5970.29	111.406	56.2329	459	30.4%	36.7231	12.4989	8.94018
0度-7dbm-7cm
2025-07-11 15:02:40	灰度-0--7dbm-7cm	73.15	110.3	194.26	109.768	1.09801	396	3.88%	31.6827	12.4989	0.289365
2025-07-11 15:02:44	灰度-0--7dbm-7cm	69.77	106.73	206.48	108.996	1.2809	310	4.28%	24.8021	12.4989	0.422881
2025-07-11 15:02:48	灰度-0--7dbm-7cm	73.15	104.87	207.85	107.975	1.28445	270	3.03%	21.6018	12.4989	0.235832
2025-07-11 15:02:53	灰度-0--7dbm-7cm	73.15	102.95	200.59	108.215	1.23788	341	3.63%	27.2823	12.4989	0.283128
2025-07-11 15:02:57	灰度-0--7dbm-7cm	69.77	102.95	197.93	104.783	1.24488	405	6.24%	32.4028	12.4989	0.799857
2025-07-11 15:03:01	灰度-0--7dbm-7cm	69.77	106.73	198.44	104.826	1.20557	441	3.23%	35.283	12.4989	0.168118
2025-07-11 15:03:07	灰度-0--7dbm-7cm	73.15	106.73	300.1	110.991	2.12639	555	20.47%	44.4038	12.4989	4.83659
2025-07-11 15:03:12	灰度-0--7dbm-7cm	69.77	106.73	4565.82	109.9	42.1255	366	17.1%	29.2825	12.4989	4.00608
2025-07-11 15:03:17	灰度-0--7dbm-7cm	69.77	108.54	309.16	111.259	2.20555	495	25.52%	39.6034	12.4989	6.85992
2025-07-11 15:03:21	灰度-0--7dbm-7cm	73.15	102.95	307.67	109.597	2.278	506	23.94%	40.4835	12.4989	6.28343
2025-07-11 15:03:25	灰度-0--7dbm-7cm	69.77	106.73	294.92	111.32	2.10953	604	28.82%	48.3241	12.4989	7.95208
2025-07-11 15:03:30	灰度-0--7dbm-7cm	73.15	108.54	359.49	110.993	2.63811	547	29.33%	43.7637	12.4989	8.33649
0度-6dbm-1.5cm
2025-07-11 15:05:27	灰度-0--6dbm-1.5cm	76.32	116.88	3649.29	130.851	30.5696	120	10.13%	9.60082	12.4989	2.04503
2025-07-11 15:05:33	灰度-0--6dbm-1.5cm	76.32	134.44	3627.28	142.13	26.413	138	10.53%	11.0409	12.4989	2.02774
2025-07-11 15:05:41	灰度-0--6dbm-1.5cm	79.32	173.55	4248.98	160.792	24.0257	200	15.99%	16.0014	12.4989	3.2868
2025-07-11 15:05:48	灰度-0--6dbm-1.5cm	79.32	138.97	4762.07	144.681	33.6961	160	18.37%	12.8011	12.4989	4.5444
2025-07-11 15:05:54	灰度-0--6dbm-1.5cm	76.32	128.26	4709.27	136.963	36.1215	163	17.75%	13.0411	12.4989	4.38758
2025-07-11 15:06:00	灰度-0--6dbm-1.5cm	76.32	147.12	5306.37	152.33	35.5496	148	23.26%	11.841	12.4989	6.29504
2025-07-11 15:09:06	灰度-0--6dbm-1.5cm	79.32	138.97	6489.25	145.996	46.1246	227	36.17%	18.1616	12.4989	11.492
2025-07-11 15:09:11	灰度-0--6dbm-1.5cm	79.32	141.12	6490.42	145.771	45.4301	241	36.29%	19.2816	12.4989	11.4959
2025-07-11 15:09:16	灰度-0--6dbm-1.5cm	79.32	140.06	6265.76	159.989	44.1699	138	32.88%	11.0409	12.4989	10.3309
2025-07-11 15:09:21	灰度-0--6dbm-1.5cm	79.32	126.95	6033.35	138.28	46.9006	226	30.57%	18.0815	12.4989	9.22196
2025-07-11 15:09:31	灰度-0--6dbm-1.5cm	76.32	128.26	6218.21	132.427	47.8862	308	33.11%	24.6421	12.4989	10.1021
2025-07-11 15:09:36	灰度-0--6dbm-1.5cm	76.32	132.05	6376.85	137.373	47.7132	271	34.83%	21.6819	12.4989	10.8935
0度-6dbm-3cm
2025-07-11 15:12:50	灰度-0--6dbm-3cm	69.77	110.3	4020.54	120.694	35.8184	171	12.57%	13.6812	12.4989	2.73167
2025-07-11 15:12:58	灰度-0--6dbm-3cm	69.77	116.88	4201.55	123.921	35.3506	176	13.93%	14.0812	12.4989	3.1221
2025-07-11 15:13:10	灰度-0--6dbm-3cm	73.15	126.95	4139.98	134.051	32.0349	192	14.42%	15.3613	12.4989	3.04366
2025-07-11 15:13:14	灰度-0--6dbm-3cm	69.77	100.96	5233.45	110.151	51.1458	341	22.51%	27.2823	12.4989	6.02052
2025-07-11 15:13:18	灰度-0--6dbm-3cm	69.77	102.95	5134.07	112.068	49.1918	309	21.56%	24.7221	12.4989	5.68406
2025-07-11 15:13:22	灰度-0--6dbm-3cm	73.15	106.73	4925.31	115.045	45.462	282	19.73%	22.5619	12.4989	5.01985
2025-07-11 15:13:26	灰度-0--6dbm-3cm	79.32	119.92	5176.55	129.013	42.5053	274	22.51%	21.9219	12.4989	5.84838
2025-07-11 15:13:30	灰度-0--6dbm-3cm	76.32	126.95	5169.79	129.057	40.1219	267	22.2%	21.3618	12.4989	5.81341
2025-07-11 15:13:34	灰度-0--6dbm-3cm	79.32	129.55	5664.33	135.743	43.1108	254	27.03%	20.3217	12.4989	7.64162
2025-07-11 15:13:40	灰度-0--6dbm-3cm	79.32	125.6	5350.31	132.354	41.9665	259	23.86%	20.7218	12.4989	6.43925
2025-07-11 15:13:45	灰度-0--6dbm-3cm	76.32	116.88	4750.22	125.461	39.9889	213	18.2%	17.0415	12.4989	4.50565
2025-07-11 15:13:49	灰度-0--6dbm-3cm	76.32	115.3	5093.19	121.338	43.5114	310	21.51%	24.8021	12.4989	5.55575
0度-6dbm-5cm
2025-07-11 16:00:20	灰度-0--6dbm-5cm	69.77	106.73	4295.85	113.361	39.596	307	15.03%	24.5621	12.4989	3.33983
2025-07-11 16:00:25	灰度-0--6dbm-5cm	69.77	106.73	4970.98	113.919	45.9216	312	20.24%	24.9621	12.4989	5.16307
2025-07-11 16:00:30	灰度-0--6dbm-5cm	69.77	100.96	4426.88	110.047	43.1568	312	15.85%	24.9621	12.4989	3.64995
2025-07-11 16:00:35	灰度-0--6dbm-5cm	69.77	104.87	5452.28	110.026	51.3255	403	24.88%	32.2428	12.4989	6.8106
2025-07-11 16:00:40	灰度-0--6dbm-5cm	69.77	102.95	5201.69	106.956	49.8487	470	22.78%	37.6032	12.4989	5.92125
2025-07-11 16:00:44	灰度-0--6dbm-5cm	69.77	102.95	5268.95	107.237	50.502	470	23.35%	37.6032	12.4989	6.15213
2025-07-11 16:00:49	灰度-0--6dbm-5cm	69.77	104.87	4728.08	111.588	44.4199	405	18.75%	32.4028	12.4989	4.45403
2025-07-11 16:00:54	灰度-0--6dbm-5cm	73.15	112.01	300.1	115.24	2.02616	518	25.09%	41.4435	12.4989	6.5473
2025-07-11 16:00:58	灰度-0--6dbm-5cm	69.77	110.3	4982.91	114.005	44.5434	436	21.13%	34.883	12.4989	5.2133
2025-07-11 16:01:03	灰度-0--6dbm-5cm	73.15	106.73	377.07	112.198	2.84756	394	16.15%	31.5227	12.4989	3.57923
2025-07-11 16:01:09	灰度-0--6dbm-5cm	69.77	108.54	4693.11	113.946	42.5957	344	18.14%	27.5224	12.4989	4.35056
2025-07-11 16:01:13	灰度-0--6dbm-5cm	73.15	113.68	4613.36	118.893	39.9385	248	17.15%	19.8417	12.4989	4.12727
0度-6dbm-7cm
2025-07-11 16:02:53	灰度-0--6dbm-7cm	73.15	108.54	208.07	108.562	1.24304	522	7.75%	41.7636	12.4989	0.971483
2025-07-11 16:02:58	灰度-0--6dbm-7cm	73.15	106.73	202.49	109.324	1.21184	448	10.24%	35.8431	12.4989	1.71295
2025-07-11 16:03:04	灰度-0--6dbm-7cm	69.77	106.73	210.16	108.117	1.31538	643	12.51%	51.4444	12.4989	2.06234
2025-07-11 16:03:08	灰度-0--6dbm-7cm	69.77	98.91	194.86	103.887	1.26469	640	10.87%	51.2044	12.4989	1.70571
2025-07-11 16:03:12	灰度-0--6dbm-7cm	69.77	104.87	201.67	107.92	1.25775	680	15.03%	54.4046	12.4989	2.83339
2025-07-11 16:03:17	灰度-0--6dbm-7cm	69.77	100.96	205.15	105.708	1.34093	541	17.22%	43.2837	12.4989	3.80305
2025-07-11 16:03:21	灰度-0--6dbm-7cm	69.77	104.87	209.14	108.139	1.32898	492	13.81%	39.3634	12.4989	2.73481
2025-07-11 16:03:26	灰度-0--6dbm-7cm	69.77	106.73	206.48	109.062	1.2809	563	13.42%	45.0438	12.4989	2.47501
2025-07-11 16:03:31	灰度-0--6dbm-7cm	69.77	102.95	194.26	106.258	1.20923	752	16.25%	60.1651	12.4989	3.16469
2025-07-11 16:03:35	灰度-0--6dbm-7cm	69.77	108.54	208.78	109.849	1.28073	673	19.0%	53.8446	12.4989	4.10958
2025-07-11 16:03:40	灰度-0--6dbm-7cm	69.77	106.73	207.62	108.529	1.29158	613	13.05%	49.0442	12.4989	2.27315
2025-07-11 16:03:45	灰度-0--6dbm-7cm	69.77	108.54	294.39	109.864	2.06947	668	20.32%	53.4446	12.4989	4.55962
30度-10dbm-1.5cm
2025-07-12 12:55:29	灰度-30度--10dbm-1.5cm	73.15	96.79	2677.9	107.072	26.9114	228	5.58%	18.2416	12.4989	0.815149
2025-07-12 12:55:44	灰度-30度--10dbm-1.5cm	76.32	112.01	3357.1	121.488	29.2901	179	8.72%	14.3212	12.4989	1.59549
2025-07-12 12:55:49	灰度-30度--10dbm-1.5cm	73.15	112.01	188.07	113.123	1.02598	265	2.69%	21.2018	12.4989	0.182728
2025-07-12 12:55:54	灰度-30度--10dbm-1.5cm	76.32	118.42	4384.17	126.849	36.3777	220	15.51%	17.6015	12.4989	3.54684
2025-07-12 12:56:01	灰度-30度--10dbm-1.5cm	79.32	115.3	5292.56	131.862	45.2146	188	22.77%	15.0413	12.4989	6.22276
2025-07-12 12:56:06	灰度-30度--10dbm-1.5cm	76.32	126.95	5313.64	132.651	41.255	204	23.08%	16.3214	12.4989	6.29881
2025-07-12 12:56:13	灰度-30度--10dbm-1.5cm	76.32	122.83	5780.67	143.35	46.441	143	27.34%	11.441	12.4989	8.10288
2025-07-12 12:56:18	灰度-30度--10dbm-1.5cm	76.32	128.26	5235.52	132.22	40.2245	213	22.53%	17.0415	12.4989	6.02987
2025-07-12 12:56:29	灰度-30度--10dbm-1.5cm	79.32	125.6	6137.6	132.224	48.2347	245	31.67%	19.6017	12.4989	9.70479
30度-10dbm-3cm
2025-07-12 13:02:37	灰度-30度--10dbm-3cm	73.15	84.87	125.6	88.023	0.618004	82	0.19%	6.56056	12.4989	0.00264636
2025-07-12 13:02:43	灰度-30度--10dbm-3cm	76.32	110.3	2917.7	118.385	25.7605	246	7.06%	19.6817	12.4989	1.06412
2025-07-12 13:02:47	灰度-30度--10dbm-3cm	76.32	102.95	148.99	100.71	0.705877	110	0.39%	8.80075	12.4989	0.00581199
2025-07-12 13:02:52	灰度-30度--10dbm-3cm	73.15	112.01	208.28	115.363	1.20641	189	1.93%	15.1213	12.4989	0.111432
2025-07-12 13:02:56	灰度-30度--10dbm-3cm	66.16	89.93	108.54	91.392	0.471255	5	0.01%	0.400034	12.4989	0.000172506
2025-07-12 13:03:00	灰度-30度--10dbm-3cm	76.32	108.54	206.06	111.366	1.19532	255	2.75%	20.4017	12.4989	0.195642
2025-07-12 13:03:05	灰度-30度--10dbm-3cm	79.32	130.81	5379.01	138.755	40.5144	236	24.31%	18.8816	12.4989	6.55228
2025-07-12 13:03:09	灰度-30度--10dbm-3cm	76.32	115.3	498.94	118.58	3.66539	340	13.41%	27.2023	12.4989	2.70266
2025-07-12 13:03:14	灰度-30度--10dbm-3cm	76.32	116.88	3899.04	120.891	32.7064	309	12.68%	24.7221	12.4989	2.50997
30度-10dbm-5cm
2025-07-12 13:06:25	灰色-30度--10dbm-5cm	73.15	112.01	206.75	111.845	1.19275	381	4.62%	30.4826	12.4989	0.417958
2025-07-12 13:06:30	灰色-30度--10dbm-5cm	66.16	82.16	106.73	82.7844	0.493793	36	0.07%	2.88025	12.4989	0.000983629
2025-07-12 13:06:35	灰色-30度--10dbm-5cm	69.77	89.93	129.55	89.9669	0.664739	111	0.29%	8.88076	12.4989	0.00401803
30度-9dbm-1.5cm
2025-07-12 13:08:09	灰度-30度--9dbm-1.5cm	73.15	112.01	4000.99	125.669	35.0669	183	12.68%	14.6413	12.4989	2.69948
2025-07-12 13:08:15	灰度-30度--9dbm-1.5cm	76.32	125.6	5887.54	136.126	46.2677	211	28.8%	16.8814	12.4989	8.5652
2025-07-12 13:08:21	灰度-30度--9dbm-1.5cm	76.32	116.88	4192.46	126.635	35.2168	179	13.83%	14.3212	12.4989	3.09968
2025-07-12 13:08:27	灰度-30度--9dbm-1.5cm	79.32	122.83	4869.01	139.379	38.9945	157	19.02%	12.5611	12.4989	4.84986
2025-07-12 13:08:32	灰度-30度--9dbm-1.5cm	79.32	126.95	5257.03	136.453	40.7854	165	22.32%	13.2011	12.4989	6.09652
2025-07-12 13:08:37	灰度-30度--9dbm-1.5cm	76.32	108.54	5124.74	122.423	46.5121	232	21.32%	18.5616	12.4989	5.65099
2025-07-12 13:08:44	灰度-30度--9dbm-1.5cm	79.32	122.83	6861.32	131.576	55.2145	309	40.52%	24.7221	12.4989	13.5558
2025-07-12 13:08:48	灰度-30度--9dbm-1.5cm	82.16	133.26	5772.35	158.349	42.6999	110	27.11%	8.80075	12.4989	8.06452
2025-07-12 13:08:54	灰度-30度--9dbm-1.5cm	76.32	115.3	5148.56	135.878	43.9917	158	21.43%	12.6411	12.4989	5.73242
30度-9dbm-3cm
2025-07-12 13:11:25	灰度-30度--9dbm-3cm	76.32	110.3	3202.09	122.088	28.3388	222	8.44%	17.7615	12.4989	1.40306
2025-07-12 13:11:32	灰度-30度--9dbm-3cm	69.77	84.87	110.3	84.7309	0.477554	32	0.07%	2.56022	12.4989	0.000884742
2025-07-12 13:11:40	灰度-30度--9dbm-3cm	76.32	134.44	2335.03	131.793	16.8009	113	4.18%	9.04077	12.4989	0.544173
2025-07-12 13:11:48	灰度-30度--9dbm-3cm	73.15	106.73	4793.28	114.177	44.225	411	19.37%	32.8828	12.4989	4.64346
2025-07-12 13:11:53	灰度-30度--9dbm-3cm	73.15	119.92	511.45	120.273	3.65494	351	14.02%	28.0824	12.4989	2.80433
2025-07-12 13:11:59	灰度-30度--9dbm-3cm	76.32	121.39	3753.39	127.256	30.2914	215	11.39%	17.2015	12.4989	2.23551
2025-07-12 13:12:04	灰度-30度--9dbm-3cm	76.32	119.92	5236.13	126.365	43.0271	278	22.83%	22.2419	12.4989	6.03903
2025-07-12 13:12:11	灰度-30度--9dbm-3cm	76.32	122.83	4875.67	125.073	39.0731	361	20.31%	28.8825	12.4989	4.89066
2025-07-12 13:12:17	灰度-30度--9dbm-3cm	76.32	121.39	497.28	126.047	3.46783	468	24.94%	37.4432	12.4989	6.23891
30度-9dbm-5cm
2025-07-12 13:14:27	灰度-30度--9dbm-5cm	66.16	92.31	166.19	95.4972	1.08363	99	0.33%	7.92068	12.4989	0.00499125
2025-07-12 13:14:31	灰度-30度--9dbm-5cm	66.16	84.87	106.73	83.6208	0.478025	24	0.05%	1.92016	12.4989	0.000657811
2025-07-12 13:14:36	灰度-30度--9dbm-5cm	66.16	79.32	133.26	88.203	0.84594	23	0.07%	1.84016	12.4989	0.00098518
2025-07-12 13:14:54	灰度-30度--9dbm-5cm	73.15	108.54	490.58	116.244	3.84586	553	28.68%	44.2438	12.4989	7.79181
2025-07-12 13:15:01	灰度-30度--9dbm-5cm	76.32	126.95	437.18	125.357	2.84254	442	21.89%	35.363	12.4989	5.24856
2025-07-12 13:15:07	灰度-30度--9dbm-5cm	76.32	121.39	5962.1	131.811	48.4865	264	29.93%	21.1218	12.4989	8.90116
2025-07-12 13:15:16	灰度-30度--9dbm-5cm	79.32	143.19	560.54	138.018	3.36071	463	26.0%	37.0432	12.4989	6.26781
2025-07-12 13:15:22	灰度-30度--9dbm-5cm	84.87	182.66	4829.6	168.088	25.9757	236	21.1%	18.8816	12.4989	4.79923
2025-07-12 13:15:30	灰度-30度--9dbm-5cm	82.16	168.14	585.73	151.528	2.99494	339	20.85%	27.1223	12.4989	4.54581
30度-8dbm-1.5cm
2025-07-12 13:18:01	灰度-30度--8dbm-1.5cm	76.32	136.75	2263.72	132.844	15.9956	431	15.48%	34.4829	12.4989	2.37424
2025-07-12 13:18:09	灰度-30度--8dbm-1.5cm	76.32	136.75	2339.59	131.762	16.5504	121	4.26%	9.68083	12.4989	0.54734
2025-07-12 13:18:13	灰度-30度--8dbm-1.5cm	76.32	141.12	2968.22	130.989	20.4925	159	7.0%	12.7211	12.4989	1.10927
2025-07-12 13:18:18	灰度-30度--8dbm-1.5cm	76.32	119.92	500.32	123.972	3.53569	308	11.83%	24.6421	12.4989	2.1756
2025-07-12 13:18:26	灰度-30度--8dbm-1.5cm	76.32	129.55	5763.9	138.466	43.9026	215	27.72%	17.2015	12.4989	8.04284
2025-07-12 13:18:34	灰度-30度--8dbm-1.5cm	76.32	125.6	4455.09	128.111	34.8628	266	16.39%	21.2818	12.4989	3.72871
2025-07-12 13:18:39	灰度-30度--8dbm-1.5cm	76.32	116.88	441.69	119.046	3.12603	519	20.91%	41.5235	12.4989	4.84772
2025-07-12 13:18:51	灰度-30度--8dbm-1.5cm	79.32	150.8	5115.25	148.027	33.3948	189	21.73%	15.1213	12.4989	5.6326
2025-07-12 13:19:00	灰度-30度--8dbm-1.5cm	82.16	133.26	5987.15	145.207	44.3118	198	30.21%	15.8414	12.4989	9.02572
30度-8dbm-3cm
2025-07-12 13:31:12	灰度-30度--8dbm-3cm	73.15	115.3	208.96	116.358	1.17788	460	7.52%	36.8031	12.4989	0.870706
2025-07-12 13:31:16	灰度-30度--8dbm-3cm	73.15	122.83	1938.77	123.258	15.1886	99	2.79%	7.92068	12.4989	0.311682
2025-07-12 13:31:21	灰度-30度--8dbm-3cm	69.77	115.3	2915.29	118.979	24.6793	120	6.26%	9.60082	12.4989	1.04403
2025-07-12 13:31:31	灰度-30度--8dbm-3cm	76.32	137.87	5036.93	135.066	35.9803	329	22.13%	26.3222	12.4989	5.40595
2025-07-12 13:31:37	灰度-30度--8dbm-3cm	73.15	112.01	3848.46	121.954	33.7051	179	11.58%	14.3212	12.4989	2.39932
2025-07-12 13:31:42	灰度-30度--8dbm-3cm	73.15	115.3	3398.58	119.175	28.8415	183	8.95%	14.6413	12.4989	1.65503
2025-07-12 13:31:47	灰度-30度--8dbm-3cm	79.32	134.44	478.85	132.318	2.97181	358	13.2%	28.6424	12.4989	2.3036
2025-07-12 13:31:52	灰度-30度--8dbm-3cm	76.32	116.88	3987.85	122.164	33.4662	284	13.2%	22.7219	12.4989	2.68353
2025-07-12 13:31:56	灰度-30度--8dbm-3cm	76.32	121.39	5071.5	122.236	41.1498	393	22.16%	31.4427	12.4989	5.50334
30度-8dbm-5cm
2025-07-12 13:33:46	灰度-30度--8dbm-5cm	76.32	102.95	1923.67	111.809	17.9441	140	2.81%	11.201	12.4989	0.305317
2025-07-12 13:33:51	灰度-30度--8dbm-5cm	73.15	110.3	192.01	110.999	1.07761	277	3.24%	22.1619	12.4989	0.269045
2025-07-12 13:33:57	灰度-30度--8dbm-5cm	73.15	115.3	208.96	116.957	1.17788	289	4.8%	23.122	12.4989	0.502809
2025-07-12 13:34:02	灰度-30度--8dbm-5cm	73.15	106.73	299.59	111.754	2.12162	250	5.77%	20.0017	12.4989	0.807709
2025-07-12 13:34:07	灰度-30度--8dbm-5cm	69.77	106.73	202.29	110.781	1.24164	483	20.76%	38.6433	12.4989	5.07584
2025-07-12 13:34:11	灰度-30度--8dbm-5cm	73.15	110.3	4741.43	116.874	42.3235	352	18.67%	28.1624	12.4989	4.48741
2025-07-12 13:34:16	灰度-30度--8dbm-5cm	69.77	102.95	207.01	106.753	1.33307	427	13.1%	34.1629	12.4989	2.63522
2025-07-12 13:34:22	灰度-30度--8dbm-5cm	69.77	113.68	4951.28	115.931	42.9408	421	20.84%	33.6829	12.4989	5.11509
2025-07-12 13:34:28	灰度-30度--8dbm-5cm	73.15	115.3	5041.51	120.726	43.0907	391	21.64%	31.2827	12.4989	5.39863
30度-8dbm-7cm
2025-07-12 13:35:57	灰度-30度--8dbm-7cm	69.77	106.73	206.2	107.404	1.27827	266	1.69%	21.2818	12.4989	0.0526487
2025-07-12 13:36:01	灰度-30度--8dbm-7cm	69.77	102.95	182.21	103.821	1.09218	433	2.08%	34.643	12.4989	0.0421454
2025-07-12 13:36:07	灰度-30度--8dbm-7cm	69.77	102.95	187.29	105.803	1.14153	377	4.15%	30.1626	12.4989	0.37987
2025-07-12 13:36:12	灰度-30度--8dbm-7cm	69.77	98.91	2365.71	107.637	23.2124	166	4.18%	13.2811	12.4989	0.561833
2025-07-12 13:36:16	灰度-30度--8dbm-7cm	73.15	106.73	206.75	109.474	1.25176	717	14.39%	57.3649	12.4989	2.50754
2025-07-12 13:36:20	灰度-30度--8dbm-7cm	73.15	115.3	324.98	118.604	2.18413	558	20.34%	44.6438	12.4989	4.56317
2025-07-12 13:36:26	灰度-30度--8dbm-7cm	76.32	119.92	357.84	122.509	2.34757	796	21.79%	63.6854	12.4989	4.31944
2025-07-12 13:36:31	灰度-30度--8dbm-7cm	73.15	112.01	343.42	113.631	2.41291	472	15.6%	37.7632	12.4989	3.22277
2025-07-12 13:36:38	灰度-30度--8dbm-7cm	79.32	135.61	410.58	131.192	2.44274	662	26.65%	52.9645	12.4989	6.14666
30度-7dbm-1.5cm
2025-07-12 13:38:35	灰度-30度--7dbm-1.5cm	69.77	102.95	335.03	108.283	2.57659	439	17.8%	35.123	12.4989	4.1235
2025-07-12 13:38:42	灰度-30度--7dbm-1.5cm	69.77	106.73	4977.23	111.21	45.9801	326	20.32%	26.0822	12.4989	5.18348
2025-07-12 13:38:58	灰度-30度--7dbm-1.5cm	69.77	100.96	4364.65	107.894	42.5404	362	15.75%	28.9625	12.4989	3.51028
2025-07-12 13:39:04	灰度-30度--7dbm-1.5cm	69.77	104.87	5140.84	110.232	48.3558	380	21.99%	30.4026	12.4989	5.71353
2025-07-12 13:39:10	灰度-30度--7dbm-1.5cm	69.77	102.95	5574.5	111.702	53.4699	411	26.15%	32.8828	12.4989	7.27916
2025-07-12 13:39:16	灰度-30度--7dbm-1.5cm	76.32	113.68	400.63	117.53	2.85283	436	21.28%	34.883	12.4989	5.2395
2025-07-12 13:39:24	灰度-30度--7dbm-1.5cm	76.32	112.01	343.85	117.444	2.38845	598	29.2%	47.8441	12.4989	7.94234
2025-07-12 13:39:30	灰度-30度--7dbm-1.5cm	73.15	116.88	509.84	117.207	3.73623	492	27.42%	39.3634	12.4989	7.46389
2025-07-12 13:39:34	灰度-30度--7dbm-1.5cm	76.32	115.3	537.19	120.365	3.99714	455	22.15%	36.4031	12.4989	5.44611
30度-7dbm-3cm
2025-07-12 13:42:14	灰度-30度--7dbm-3cm	73.15	108.54	201.03	110.372	1.17818	354	6.47%	28.3224	12.4989	0.856273
2025-07-12 13:42:18	灰度-30度--7dbm-3cm	73.15	110.3	299.07	114.434	2.04823	254	4.56%	20.3217	12.4989	0.514543
2025-07-12 13:42:23	灰度-30度--7dbm-3cm	73.15	112.01	419.9	114.368	3.09571	304	8.26%	24.3221	12.4989	1.32651
2025-07-12 13:42:29	灰度-30度--7dbm-3cm	73.15	104.87	3489.2	113.185	32.5741	248	9.64%	19.8417	12.4989	1.794
2025-07-12 13:42:34	灰度-30度--7dbm-3cm	73.15	124.23	4336.23	125.357	34.316	302	15.77%	24.1621	12.4989	3.44347
2025-07-12 13:42:40	灰度-30度--7dbm-3cm	73.15	118.42	440.09	122.217	3.09863	352	15.05%	28.1624	12.4989	3.11241
2025-07-12 13:42:48	灰度-30度--7dbm-3cm	76.32	121.39	5211.05	125.307	42.2994	378	23.29%	30.2426	12.4989	5.96242
2025-07-12 13:42:52	灰度-30度--7dbm-3cm	79.32	135.61	424.64	134.208	2.54642	518	32.75%	41.4435	12.4989	9.09019
2025-07-12 13:42:57	灰度-30度--7dbm-3cm	76.32	122.83	5193.04	127.925	41.6569	387	23.46%	30.9626	12.4989	5.91669
30度-7dbm-5cm
2025-07-12 13:45:06	灰度-30度--7dbm-5cm	76.32	124.23	4383.21	125.686	34.6687	232	15.54%	18.5616	12.4989	3.54503
2025-07-12 13:45:13	灰度-30度--7dbm-5cm	73.15	116.88	3889.05	125.191	32.648	173	11.82%	13.8412	12.4989	2.47644
2025-07-12 13:45:18	灰度-30度--7dbm-5cm	76.32	112.01	3922.32	121.363	34.3362	183	11.98%	14.6413	12.4989	2.53798
2025-07-12 13:45:26	灰度-30度--7dbm-5cm	79.32	125.6	515.72	128.731	3.47452	497	31.07%	39.7634	12.4989	8.6411
2025-07-12 13:45:31	灰度-30度--7dbm-5cm	73.15	113.68	5254.88	118.555	45.5817	336	23.0%	26.8823	12.4989	6.09919
2025-07-12 13:45:35	灰度-30度--7dbm-5cm	76.32	128.26	5710.1	130.656	43.9247	388	28.55%	31.0427	12.4989	7.85173
2025-07-12 13:45:40	灰度-30度--7dbm-5cm	82.16	126.95	5535.97	129.944	42.9603	389	26.53%	31.1227	12.4989	7.15081
2025-07-12 13:45:45	灰度-30度--7dbm-5cm	79.32	138.97	457.37	135.744	2.72037	466	33.6%	37.2832	12.4989	9.65777
2025-07-12 13:45:49	灰度-30度--7dbm-5cm	76.32	121.39	6542.19	125.928	53.2653	488	37.93%	39.0433	12.4989	11.7804
30度-7dbm-7cm
2025-07-12 13:48:42	灰度-30度--7dbm-7cm	82.16	148.99	6127.47	144.975	40.5753	333	33.23%	26.6423	12.4989	9.7019
2025-07-12 13:48:46	灰度-30度--7dbm-7cm	82.16	148.06	6729.65	149.994	44.8973	259	39.44%	20.7218	12.4989	12.812
2025-07-12 13:48:52	灰度-30度--7dbm-7cm	79.32	150.8	5893.25	146.068	38.5539	253	29.78%	20.2417	12.4989	8.61531
2025-07-12 13:48:57	灰度-30度--7dbm-7cm	79.32	186.09	7149.19	172.388	37.9917	163	44.24%	13.0411	12.4989	15.332
2025-07-12 13:49:02	灰度-30度--7dbm-7cm	87.46	174.67	6945.27	167.851	39.2615	194	41.85%	15.5213	12.4989	14.0664
2025-07-12 13:49:07	灰度-30度--7dbm-7cm	82.16	193.32	7471.82	180.103	38.225	160	48.77%	12.8011	12.4989	17.5066
2025-07-12 13:49:12	灰度-30度--7dbm-7cm	79.32	144.2	7626.05	147.756	52.3352	263	51.21%	21.0418	12.4989	18.617
2025-07-12 13:49:18	灰度-30度--7dbm-7cm	79.32	153.41	8245.32	160.324	53.2299	206	60.24%	16.4814	12.4989	23.5173
2025-07-12 13:49:23	灰度-30度--7dbm-7cm	82.16	171.82	8058.74	167.124	46.424	203	57.48%	16.2414	12.4989	21.9539
30度-6dbm-1.5cm
2025-07-12 13:50:57	灰度-30度--6dbm-1.5cm	76.32	137.87	517.31	135.364	3.19859	465	21.59%	37.2032	12.4989	4.66494
2025-07-12 13:51:02	灰度-30度--6dbm-1.5cm	79.32	155.9	6103.12	146.846	38.6389	292	32.72%	23.362	12.4989	9.58365
2025-07-12 13:51:09	灰度-30度--6dbm-1.5cm	79.32	140.06	6175.79	139.922	43.5276	319	33.45%	25.5222	12.4989	9.92973
2025-07-12 13:51:15	灰度-30度--6dbm-1.5cm	79.32	150.8	6711.72	148.127	43.9814	257	39.16%	20.5618	12.4989	12.709
2025-07-12 13:51:20	灰度-30度--6dbm-1.5cm	82.16	185.68	7282.93	175.355	38.7805	198	46.86%	15.8414	12.4989	16.2416
2025-07-12 13:51:26	灰度-30度--6dbm-1.5cm	79.32	164.84	7515.05	157.546	45.1088	224	49.55%	17.9215	12.4989	17.8163
2025-07-12 13:51:32	灰度-30度--6dbm-1.5cm	82.16	151.68	7489.95	158.172	48.8383	216	49.14%	17.2815	12.4989	17.6395
2025-07-12 13:51:36	灰度-30度--6dbm-1.5cm	79.32	144.2	7345.92	147.556	50.3925	248	47.06%	19.8417	12.4989	16.6344
2025-07-12 13:51:41	灰度-30度--6dbm-1.5cm	79.32	155.9	8049.81	157.624	51.1257	214	57.15%	17.1215	12.4989	21.8817
30度-6dbm-3cm
2025-07-12 13:53:13	灰度-30度--6dbm-3cm	79.32	135.61	5347.82	135.402	38.8504	316	24.62%	25.2822	12.4989	6.4478
2025-07-12 13:53:18	灰度-30度--6dbm-3cm	76.32	124.23	3462.37	126.757	27.2563	209	9.62%	16.7214	12.4989	1.75638
2025-07-12 13:53:23	灰度-30度--6dbm-3cm	79.32	126.95	801.15	129.947	5.68594	443	22.95%	35.443	12.4989	5.4395
2025-07-12 13:53:27	灰度-30度--6dbm-3cm	76.32	119.92	374.34	122.341	2.48516	403	19.63%	32.2428	12.4989	4.59938
2025-07-12 13:53:32	灰度-30度--6dbm-3cm	76.32	130.81	495.9	129.593	3.20755	485	31.78%	38.8033	12.4989	8.92535
2025-07-12 13:53:38	灰度-30度--6dbm-3cm	76.32	121.39	6360.14	128.896	51.7655	326	34.75%	26.0822	12.4989	10.8105
2025-07-12 13:53:43	灰度-30度--6dbm-3cm	76.32	128.26	572.14	127.496	3.86574	531	36.73%	42.4836	12.4989	11.0051
2025-07-12 13:53:53	灰度-30度--6dbm-3cm	76.32	124.23	7172.04	130.038	57.1176	460	45.93%	36.8031	12.4989	15.5126
2025-07-12 13:53:58	灰度-30度--6dbm-3cm	79.32	126.95	7404.68	132.396	57.7027	457	49.13%	36.5631	12.4989	17.0676
30度-6dbm-5cm
2025-07-12 13:55:18	灰度-30度--6dbm-5cm	73.15	110.3	207.39	113.71	1.21704	554	18.87%	44.3238	12.4989	4.2096
2025-07-12 13:55:22	灰度-30度--6dbm-5cm	69.77	108.54	4787.47	110.748	43.4651	384	18.98%	30.7226	12.4989	4.61816
2025-07-12 13:55:27	灰度-30度--6dbm-5cm	69.77	108.54	4229.85	112.712	38.3276	312	14.59%	24.9621	12.4989	3.18947
2025-07-12 13:55:33	灰度-30度--6dbm-5cm	73.15	110.3	6254.25	114.62	56.039	452	33.61%	36.1631	12.4989	10.276
2025-07-12 13:55:38	灰度-30度--6dbm-5cm	73.15	108.54	5571.51	113.45	50.6575	471	26.64%	37.6832	12.4989	7.27668
2025-07-12 13:55:43	灰度-30度--6dbm-5cm	76.32	115.3	345.59	118.029	2.33539	492	26.34%	39.3634	12.4989	7.06074
2025-07-12 13:55:47	灰度-30度--6dbm-5cm	76.32	121.39	6030.51	122.622	49.0501	471	31.75%	37.6832	12.4989	9.22788
2025-07-12 13:55:51	灰度-30度--6dbm-5cm	76.32	118.42	5847.05	122.234	48.731	417	29.39%	33.3628	12.4989	8.40696
2025-07-12 13:55:55	灰度-30度--6dbm-5cm	79.32	130.81	5988.17	133.064	45.1712	357	31.1%	28.5624	12.4989	9.03698
30度-6dbm-7cm
2025-07-12 13:57:04	灰度-30度--6dbm-7cm	69.77	96.79	197.67	102.979	1.32142	380	9.2%	30.4026	12.4989	1.59045
2025-07-12 13:57:09	灰度-30度--6dbm-7cm	69.77	102.95	190.64	105.325	1.17407	418	5.91%	33.4429	12.4989	0.701937
2025-07-12 13:57:12	灰度-30度--6dbm-7cm	69.77	104.87	310.15	106.396	2.29217	440	9.68%	35.203	12.4989	1.59789
2025-07-12 13:57:16	灰度-30度--6dbm-7cm	69.77	104.87	5629.3	112.555	53.0135	393	26.7%	31.4427	12.4989	7.49715
2025-07-12 13:57:22	灰度-30度--6dbm-7cm	69.77	104.87	5946.66	109.493	56.0398	444	29.98%	35.523	12.4989	8.83293
2025-07-12 13:57:27	灰度-30度--6dbm-7cm	69.77	104.87	6071.53	108.289	57.2305	553	31.83%	44.2438	12.4989	9.40693
2025-07-12 13:57:32	灰度-30度--6dbm-7cm	76.32	119.92	6606.97	126.346	54.4584	445	38.4%	35.603	12.4989	12.1272
2025-07-12 13:57:36	灰度-30度--6dbm-7cm	76.32	115.3	6233.45	120.333	53.401	488	33.88%	39.0433	12.4989	10.184
2025-07-12 13:57:41	灰度-30度--6dbm-7cm	73.15	112.01	6250.16	117.337	55.147	476	33.83%	38.0833	12.4989	10.2606
45度-10dbm-1.5cm
2025-07-12 14:00:50	灰度-45度--10dbm-1.5cm	76.32	108.54	201.67	112.209	1.15487	1223	32.3%	50.9681	23.9954	11.6411
2025-07-12 14:00:56	灰度-45度--10dbm-1.5cm	82.16	135.61	6833.28	144.06	49.7833	416	22.42%	17.3366	23.9954	7.03537
2025-07-12 14:01:03	灰度-45度--10dbm-1.5cm	82.16	133.26	6742.13	142.141	49.9773	392	21.62%	16.3365	23.9954	6.75617
2025-07-12 14:01:07	灰度-45度--10dbm-1.5cm	76.32	110.3	731.21	116.53	5.93735	744	30.11%	31.0059	23.9954	11.0255
2025-07-12 14:01:13	灰度-45度--10dbm-1.5cm	76.32	126.95	8148.28	137.585	63.5838	278	30.57%	11.5855	23.9954	11.8191
2025-07-12 14:01:17	灰度-45度--10dbm-1.5cm	76.32	121.39	8947.01	136.74	73.076	264	37.22%	11.0021	23.9954	15.6377
2025-07-12 14:01:23	灰度-45度--10dbm-1.5cm	76.32	113.68	8929.71	121.986	77.8799	537	37.77%	22.3793	23.9954	15.5586
2025-07-12 14:01:30	灰度-45度--10dbm-1.5cm	76.32	122.83	9674.52	135.925	78.1421	351	44.5%	14.6278	23.9954	19.7738
2025-07-12 14:01:36	灰度-45度--10dbm-1.5cm	79.32	132.05	8901.3	136.577	66.8079	383	37.39%	15.9614	23.9954	15.4135
45度-10dbm-3cm
2025-07-12 14:05:00	灰度-45度--10dbm-3cm	76.32	122.83	753.01	126.49	5.50916	447	12.73%	18.6286	23.9954	3.1921
2025-07-12 14:05:07	灰度-45度--10dbm-3cm	79.32	125.6	360.72	128.864	2.24045	389	11.16%	16.2114	23.9954	2.70033
2025-07-12 14:05:12	灰度-45度--10dbm-3cm	79.32	125.6	5203.62	127.146	40.7986	363	12.08%	15.1279	23.9954	3.09272
2025-07-12 14:05:17	灰度-45度--10dbm-3cm	79.32	119.92	7135.47	124.751	58.8405	544	23.74%	22.671	23.9954	7.95451
2025-07-12 14:05:21	灰度-45度--10dbm-3cm	76.32	119.92	446.15	123.867	3.08397	756	18.49%	31.506	23.9954	5.0957
2025-07-12 14:05:27	灰度-45度--10dbm-3cm	76.32	116.88	437.18	121.337	3.08744	606	17.24%	25.2548	23.9954	4.88087
2025-07-12 14:05:32	灰度-45度--10dbm-3cm	76.32	128.26	298.04	124.541	1.72868	632	13.64%	26.3384	23.9954	3.3144
2025-07-12 14:05:38	灰度-45度--10dbm-3cm	79.32	125.6	345.59	125.684	2.11998	741	9.8%	30.8809	23.9954	1.76032
2025-07-12 14:05:42	灰度-45度--10dbm-3cm	76.32	113.68	5899.03	119.84	51.2202	463	15.69%	19.2954	23.9954	4.49742
45度-10dbm-5cm
2025-07-12 14:24:30	灰度-45度--10dbm-5cm	73.15	113.68	310.64	115.848	2.08911	461	8.91%	19.212	23.9954	1.92575
2025-07-12 14:24:34	灰度-45度--10dbm-5cm	79.32	119.92	452.11	125.968	3.10866	468	13.11%	19.5037	23.9954	3.34759
2025-07-12 14:24:38	灰度-45度--10dbm-5cm	76.32	113.68	397.74	117.261	2.82741	534	11.98%	22.2543	23.9954	2.92749
2025-07-12 14:24:43	灰度-45度--10dbm-5cm	79.32	125.6	453.04	129.345	2.97548	585	20.82%	24.3797	23.9954	6.39062
2025-07-12 14:24:50	灰度-45度--10dbm-5cm	76.32	119.92	8236.2	126.916	68.0444	526	32.12%	21.9209	23.9954	12.2293
2025-07-12 14:24:56	灰度-45度--10dbm-5cm	79.32	128.26	9248.44	134.656	71.4885	442	40.82%	18.4202	23.9954	17.2902
2025-07-12 14:25:02	灰度-45度--10dbm-5cm	79.32	133.26	9249.5	139.044	68.8142	446	40.99%	18.5869	23.9954	17.2966
2025-07-12 14:25:07	灰度-45度--10dbm-5cm	79.32	126.95	8628.49	130.091	67.3428	527	35.39%	21.9625	23.9954	14.046
2025-07-12 14:25:13	灰度-45度--10dbm-5cm	79.32	133.26	9272.35	140.692	68.9857	439	41.3%	18.2952	23.9954	17.4312
45度-10dbm-7cm
2025-07-12 14:27:04	灰度-45度--10dbm-7cm	69.77	100.96	175.22	102.177	1.04447	169	0.38%	7.04301	23.9954	0.00582206
2025-07-12 14:27:10	灰度-45度--10dbm-7cm	73.15	145.19	185.26	117.664	0.772161	91	0.29%	3.79239	23.9954	0.00457216
2025-07-12 14:27:14	灰度-45度--10dbm-7cm	82.16	162.03	1434.23	151.242	8.34457	79	0.98%	3.2923	23.9954	0.0710678
45度-9dbm-1.5cm
2025-07-12 14:28:40	灰度-45度--9dbm-1.5cm	73.15	102.95	195.16	106.93	1.18514	1076	19.92%	44.8419	23.9954	5.866
2025-07-12 14:28:44	灰度-45度--9dbm-1.5cm	76.32	116.88	5966.15	122.421	50.3921	384	15.87%	16.0031	23.9954	4.64936
2025-07-12 14:28:49	灰度-45度--9dbm-1.5cm	76.32	115.3	6338.15	123.499	54.309	354	17.93%	14.7528	23.9954	5.56991
2025-07-12 14:28:54	灰度-45度--9dbm-1.5cm	76.32	119.92	7983.09	123.686	65.9337	632	30.25%	26.3384	23.9954	11.1339
2025-07-12 14:28:59	灰度-45度--9dbm-1.5cm	76.32	113.68	8295.73	121.902	72.303	599	32.66%	24.9631	23.9954	12.4901
2025-07-12 14:29:03	灰度-45度--9dbm-1.5cm	73.15	104.87	7391.17	115.099	69.7818	526	25.1%	21.9209	23.9954	8.82965
2025-07-12 14:29:09	灰度-45度--9dbm-1.5cm	76.32	106.73	9672.69	116.212	89.9126	792	45.32%	33.0063	23.9954	19.7757
2025-07-12 14:29:13	灰度-45度--9dbm-1.5cm	76.32	110.3	8508.76	124.056	76.45	446	33.85%	18.5869	23.9954	13.4611
2025-07-12 14:29:17	灰度-45度--9dbm-1.5cm	73.15	112.01	8341.33	131.852	73.8164	262	31.93%	10.9188	23.9954	12.6734
45度-9dbm-3cm
2025-07-12 14:31:07	灰度-45度--9dbm-3cm	76.32	106.73	203.07	110.835	1.18758	741	5.69%	30.8809	23.9954	0.765381
2025-07-12 14:31:11	灰度-45度--9dbm-3cm	79.32	124.23	330.96	126.43	2.0256	642	8.27%	26.7551	23.9954	1.32705
2025-07-12 14:31:17	灰度-45度--9dbm-3cm	79.32	130.81	366.41	126.013	2.19471	678	5.18%	28.2554	23.9954	0.453011
2025-07-12 14:31:21	灰度-45度--9dbm-3cm	76.32	118.42	328.22	120.839	2.12717	822	18.92%	34.2565	23.9954	5.31049
2025-07-12 14:31:26	灰度-45度--9dbm-3cm	76.32	118.42	392.97	122.304	2.67396	781	18.63%	32.5479	23.9954	5.15881
2025-07-12 14:31:30	灰度-45度--9dbm-3cm	76.32	113.68	308.66	117.449	2.04381	996	17.16%	41.5079	23.9954	4.36468
2025-07-12 14:31:36	灰度-45度--9dbm-3cm	76.32	125.6	525.42	125.961	3.57564	603	23.13%	25.1298	23.9954	7.47941
2025-07-12 14:31:41	灰度-45度--9dbm-3cm	79.32	132.05	1554.44	134.179	11.1709	582	24.59%	24.2546	23.9954	7.83071
2025-07-12 14:31:45	灰度-45度--9dbm-3cm	82.16	125.6	504.16	131.163	3.35987	593	26.32%	24.7131	23.9954	8.97113
45度-9dbm-5cm
2025-07-12 14:33:26	灰度-45度--9dbm-5cm	79.32	124.23	418.54	128.611	2.73058	610	21.22%	25.4215	23.9954	6.50836
2025-07-12 14:33:30	灰度-45度--9dbm-5cm	76.32	116.88	329.14	120.484	2.16307	477	5.5%	19.8788	23.9954	0.795857
2025-07-12 14:33:35	灰度-45度--9dbm-5cm	76.32	108.54	291.75	114.419	1.9848	989	14.73%	41.2162	23.9954	3.51855
2025-07-12 14:33:42	灰度-45度--9dbm-5cm	82.16	149.9	9888.93	150.154	65.4221	466	48.12%	19.4204	23.9954	21.1724
2025-07-12 14:33:48	灰度-45度--9dbm-5cm	82.16	156.71	411.28	142.754	2.10019	730	23.52%	30.4225	23.9954	6.88196
2025-07-12 14:33:53	灰度-45度--9dbm-5cm	79.32	124.23	302.65	123.541	1.79771	739	15.09%	30.7976	23.9954	3.7737
45度-8dbm-1.5cm
2025-07-12 14:35:24	灰度-45度--8dbm-1.5cm	76.32	119.92	411.63	123.155	2.79611	794	31.64%	33.0897	23.9954	11.544
2025-07-12 14:35:29	灰度-45度--8dbm-1.5cm	76.32	124.23	7761.89	129.35	61.8657	547	28.64%	22.796	23.9954	10.2482
2025-07-12 14:35:34	灰度-45度--8dbm-1.5cm	79.32	130.81	8721.85	133.731	66.0693	580	36.67%	24.1713	23.9954	14.5206
2025-07-12 14:35:39	灰度-45度--8dbm-1.5cm	79.32	128.26	10371.5	136.298	80.2445	424	52.06%	17.67	23.9954	24.3647
2025-07-12 14:35:44	灰度-45度--8dbm-1.5cm	79.32	134.44	10696	141.569	78.9698	433	55.91%	18.0451	23.9954	26.7326
2025-07-12 14:35:48	灰度-45度--8dbm-1.5cm	79.32	130.81	10797.9	137.42	81.9401	525	57.52%	21.8792	23.9954	27.5165
2025-07-12 14:35:53	灰度-45度--8dbm-1.5cm	84.87	149.9	11243.6	156.048	74.4414	407	62.66%	16.9616	23.9954	31.0603
2025-07-12 14:35:58	灰度-45度--8dbm-1.5cm	82.16	155.9	11040.6	156.694	70.2917	423	60.52%	17.6284	23.9954	29.4241
2025-07-12 14:36:03	灰度-45度--8dbm-1.5cm	82.16	143.19	11188.7	147.633	77.5651	453	61.95%	18.8786	23.9954	30.6044
45度-8dbm-3cm
2025-07-12 14:38:37	灰度-45度--8dbm-3cm	79.32	138.97	403.15	132.916	2.33022	632	7.3%	26.3384	23.9954	0.918372
2025-07-12 14:38:42	灰度-45度--8dbm-3cm	82.16	154.25	413.37	141.494	2.14723	606	6.91%	25.2548	23.9954	0.684859
2025-07-12 14:38:48	灰度-45度--8dbm-3cm	79.32	149.9	206.34	130.2	0.847365	350	1.54%	14.5861	23.9954	0.0293433
2025-07-12 14:38:53	灰度-45度--8dbm-3cm	82.16	146.16	352.41	139.882	1.849	766	21.28%	31.9228	23.9954	5.87989
2025-07-12 14:38:57	灰度-45度--8dbm-3cm	82.16	150.8	524.12	146.924	2.93077	769	27.97%	32.0478	23.9954	8.63461
2025-07-12 14:39:02	灰度-45度--8dbm-3cm	79.32	124.23	292.81	123.837	1.71851	866	19.39%	36.0902	23.9954	5.42457
2025-07-12 14:39:07	灰度-45度--8dbm-3cm	79.32	135.61	9224.36	137.988	67.4363	585	41.75%	24.3797	23.9954	17.1998
2025-07-12 14:39:11	灰度-45度--8dbm-3cm	82.16	144.2	8903.06	144.366	61.1713	548	38.72%	22.8377	23.9954	15.454
2025-07-12 14:39:15	灰度-45度--8dbm-3cm	82.16	148.06	8805.7	142.99	58.919	569	37.95%	23.7129	23.9954	14.959
45度-8dbm-5cm
2025-07-12 14:41:28	灰度-45度--8dbm-5cm	79.32	121.39	209.31	120.828	1.07085	1008	13.66%	42.008	23.9954	2.91066
2025-07-12 14:41:32	灰度-45度--8dbm-5cm	79.32	130.81	490.29	130.479	3.14173	788	25.25%	32.8396	23.9954	7.95394
2025-07-12 14:41:36	灰度-45度--8dbm-5cm	82.16	129.55	392.97	132.032	2.39915	748	19.82%	31.1726	23.9954	5.52105
45度-7dbm-1.5cm
2025-07-12 14:43:24	灰度-45度--7dbm-1.5cm	76.32	121.39	8556.09	128.298	69.8556	456	34.44%	19.0036	23.9954	13.6893
2025-07-12 14:43:28	灰度-45度--7dbm-1.5cm	79.32	133.26	8560.54	143.785	63.6442	282	34.12%	11.7522	23.9954	13.7049
2025-07-12 14:43:33	灰度-45度--7dbm-1.5cm	79.32	125.6	8534.24	133.898	67.3162	383	34.14%	15.9614	23.9954	13.586
2025-07-12 14:43:38	灰度-45度--7dbm-1.5cm	79.32	141.12	9867.03	151.975	69.3574	281	46.6%	11.7106	23.9954	20.9911
2025-07-12 14:43:45	灰度-45度--7dbm-1.5cm	76.32	121.39	10522.4	129.137	86.0541	599	54.38%	24.9631	23.9954	25.4646
2025-07-12 14:43:50	灰度-45度--7dbm-1.5cm	76.32	122.83	10196	128.166	82.3876	705	51.34%	29.3806	23.9954	23.1897
2025-07-12 14:43:57	灰度-45度--7dbm-1.5cm	76.32	124.23	10679.5	129.181	85.351	805	57.16%	33.5481	23.9954	26.6514
2025-07-12 14:44:02	灰度-45度--7dbm-1.5cm	79.32	130.81	10562.9	135.045	80.1436	557	54.79%	23.2128	23.9954	25.7548
2025-07-12 14:44:07	灰度-45度--7dbm-1.5cm	76.32	122.83	10894	130.486	88.07	714	59.14%	29.7557	23.9954	28.2664
45度-7dbm-3cm
2025-07-12 14:45:32	灰度-45度--7dbm-3cm	79.32	149.9	332.78	137.046	1.69086	626	7.66%	26.0883	23.9954	1.04023
2025-07-12 14:45:39	灰度-45度--7dbm-3cm	82.16	153.41	315.51	139.099	1.52109	677	6.46%	28.2137	23.9954	0.621745
2025-07-12 14:45:43	灰度-45度--7dbm-3cm	84.87	154.25	312.6	140.572	1.47637	516	4.44%	21.5041	23.9954	0.325917
2025-07-12 14:45:48	灰度-45度--7dbm-3cm	84.87	168.77	583.22	157.078	2.95284	594	25.96%	24.7547	23.9954	7.95223
2025-07-12 14:45:52	灰度-45度--7dbm-3cm	82.16	148.99	396.28	139.347	2.10833	674	24.33%	28.0887	23.9954	7.625
2025-07-12 14:45:57	灰度-45度--7dbm-3cm	76.32	134.44	459.51	128.567	2.85027	771	32.38%	32.1311	23.9954	11.8005
2025-07-12 14:46:02	灰度-45度--7dbm-3cm	79.32	151.68	8134.97	142.979	53.1095	498	31.82%	20.754	23.9954	11.7904
2025-07-12 14:46:07	灰度-45度--7dbm-3cm	79.32	147.12	10242.3	149.52	69.0796	360	50.87%	15.0029	23.9954	23.4762
2025-07-12 14:46:12	灰度-45度--7dbm-3cm	79.32	130.81	9747.82	137.014	73.9125	476	45.98%	19.8371	23.9954	20.2437
45度-7dbm-5cm
2025-07-12 14:47:22	灰度-45度--7dbm-5cm	76.32	126.95	208.59	122.785	1.04191	951	17.28%	39.6326	23.9954	4.38378
2025-07-12 14:47:27	灰度-45度--7dbm-5cm	79.32	121.39	326.84	123.497	2.03905	900	21.02%	37.5072	23.9954	6.06376
2025-07-12 14:47:37	灰度-45度--7dbm-5cm	76.32	116.88	295.96	116.175	1.87919	1104	21.44%	46.0088	23.9954	6.22056
2025-07-12 14:47:43	灰度-45度--7dbm-5cm	76.32	119.92	361.13	120.84	2.375	1380	11.53%	57.511	23.9954	1.50819
2025-07-12 14:47:48	灰度-45度--7dbm-5cm	79.32	132.05	386.63	128.725	2.32722	797	20.75%	33.2147	23.9954	5.88793
2025-07-12 14:47:52	灰度-45度--7dbm-5cm	79.32	128.26	338.59	126.192	2.02144	924	18.96%	38.5074	23.9954	4.99809
45度-7dbm-7cm
2025-07-12 14:49:17	灰度-45度--7dbm-7cm	82.16	130.81	426.65	133.117	2.63351	645	29.92%	26.8801	23.9954	10.7046
2025-07-12 14:49:22	灰度-45度--7dbm-7cm	79.32	128.26	448.98	132.009	2.88211	1045	24.49%	43.55	23.9954	6.86916
2025-07-12 14:49:26	灰度-45度--7dbm-7cm	76.32	124.23	8851.3	129.906	70.635	571	37.69%	23.7962	23.9954	15.1751
45度-6dbm-1.5cm
2025-07-12 14:50:45	灰度-45度--6dbm-1.5cm	76.32	121.39	314.54	121.368	1.96244	911	28.65%	37.9656	23.9954	9.76278
2025-07-12 14:50:52	灰度-45度--6dbm-1.5cm	76.32	144.2	453.66	134.951	2.61678	861	13.64%	35.8819	23.9954	2.47246
2025-07-12 14:50:56	灰度-45度--6dbm-1.5cm	79.32	148.99	392.23	138.657	2.10021	542	13.46%	22.5877	23.9954	3.11781
2025-07-12 14:51:01	灰度-45度--6dbm-1.5cm	79.32	144.2	417.51	135.915	2.34528	740	35.92%	30.8392	23.9954	13.5758
2025-07-12 14:51:06	灰度-45度--6dbm-1.5cm	76.32	116.88	9387.63	122.095	79.6656	605	42.31%	25.2132	23.9954	18.0787
2025-07-12 14:51:11	灰度-45度--6dbm-1.5cm	76.32	126.95	10035.1	128.434	78.4463	625	49.26%	26.0466	23.9954	22.0927
2025-07-12 14:51:16	灰度-45度--6dbm-1.5cm	73.15	121.39	9843.51	126.229	80.4874	587	46.94%	24.463	23.9954	20.8433
2025-07-12 14:51:22	灰度-45度--6dbm-1.5cm	76.32	138.97	10371.5	143.679	74.0821	473	52.86%	19.7121	23.9954	24.3963
2025-07-12 14:51:27	灰度-45度--6dbm-1.5cm	76.32	126.95	10600.1	132.794	82.8974	565	55.17%	23.5462	23.9954	26.0291
45度-6dbm-3cm
2025-07-12 14:52:55	灰度-45度--6dbm-3cm	79.32	140.06	195.16	131.11	0.827074	425	6.64%	17.7117	23.9954	1.13361
2025-07-12 14:52:59	灰度-45度--6dbm-3cm	76.32	129.55	198.19	120.034	0.940718	499	4.03%	20.7956	23.9954	0.441404
2025-07-12 14:53:03	灰度-45度--6dbm-3cm	76.32	129.55	199.43	120.571	0.950289	704	3.16%	29.3389	23.9954	0.134652
2025-07-12 14:53:09	灰度-45度--6dbm-3cm	79.32	142.16	356.18	133.684	1.94752	909	17.99%	37.8822	23.9954	4.36179
2025-07-12 14:53:13	灰度-45度--6dbm-3cm	79.32	141.12	317.91	128.265	1.69069	996	5.06%	41.5079	23.9954	0.162417
2025-07-12 14:53:18	灰度-45度--6dbm-3cm	76.32	129.55	300.61	123.219	1.7313	1022	12.32%	42.5915	23.9954	2.22831
2025-07-12 14:53:22	灰度-45度--6dbm-3cm	79.32	148.06	294.92	135.29	1.45617	625	10.61%	26.0466	23.9954	2.03492
2025-07-12 14:53:27	灰度-45度--6dbm-3cm	82.16	145.19	307.17	135.64	1.54976	993	14.09%	41.3829	23.9954	2.64159
2025-07-12 14:53:32	灰度-45度--6dbm-3cm	79.32	142.16	409.18	132.997	2.32034	948	16.84%	39.5076	23.9954	3.7013
45度-6dbm-5cm
2025-07-12 14:54:57	灰度-45度--6dbm-5cm	76.32	122.83	351.14	122.964	2.2374	697	20.49%	29.0472	23.9954	6.17911
2025-07-12 14:55:02	灰度-45度--6dbm-5cm	79.32	132.05	518.1	134.071	3.32283	644	26.63%	26.8385	23.9954	8.87942
2025-07-12 14:55:07	灰度-45度--6dbm-5cm	76.32	121.39	473.59	124.341	3.27267	823	17.51%	34.2982	23.9954	4.51293
45度-6dbm-7cm
2025-07-12 14:56:21	灰度-45度--6dbm-7cm	76.32	122.83	292.28	120.526	1.7582	856	4.89%	35.6735	23.9954	0.316128
2025-07-12 14:56:26	灰度-45度--6dbm-7cm	79.32	130.81	401.71	130.444	2.46457	999	17.21%	41.633	23.9954	3.78071
2025-07-12 14:56:33	灰度-45度--6dbm-7cm	76.32	125.6	365.2	124.221	2.3	1320	14.78%	55.0105	23.9954	2.35651
45度未知-1.5cm
2025-07-12 14:58:28	灰度-45度-未知-1.5cm	76.32	119.92	488.88	124.391	3.44029	755	33.24%	31.4643	23.9954	12.4148
2025-07-12 14:58:33	灰度-45度-未知-1.5cm	79.32	134.44	8990.46	140.08	66.2834	415	38.5%	17.295	23.9954	15.8866
2025-07-12 14:58:37	灰度-45度-未知-1.5cm	76.32	118.42	8917.64	124.083	74.6607	652	38.17%	27.1719	23.9954	15.5054
2025-07-12 14:58:42	灰度-45度-未知-1.5cm	76.32	121.39	10820	133.361	88.5056	433	56.98%	18.0451	23.9954	27.6599
2025-07-12 14:58:46	灰度-45度-未知-1.5cm	76.32	122.83	11038.7	129.602	89.2486	591	60.14%	24.6297	23.9954	29.3848
2025-07-12 14:58:51	灰度-45度-未知-1.5cm	76.32	116.88	11267.2	126.356	95.7471	596	62.67%	24.8381	23.9954	31.2448
2025-07-12 14:58:55	灰度-45度-未知-1.5cm	79.32	121.39	11407.1	135.778	93.3172	422	63.86%	17.5867	23.9954	32.4057
2025-07-12 14:58:59	灰度-45度-未知-1.5cm	79.32	142.16	10569	142.757	73.788	513	55.12%	21.3791	23.9954	25.8117
2025-07-12 14:59:03	灰度-45度-未知-1.5cm	79.32	153.41	11604.2	155.605	75.1245	283	66.17%	11.7939	23.9954	34.1154
45度未知-3cm
2025-07-12 15:00:23	灰度-45度-未知-3cm	82.16	159.05	430.97	143.614	2.19308	626	20.48%	26.0883	23.9954	5.73255
2025-07-12 15:00:27	灰度-45度-未知-3cm	87.46	181.75	1070.11	167.704	5.4066	464	17.86%	19.337	23.9954	4.1847
2025-07-12 15:00:31	灰度-45度-未知-3cm	79.32	159.05	732.6	147.254	4.10739	588	21.42%	24.5047	23.9954	5.90676
2025-07-12 15:00:36	灰度-45度-未知-3cm	82.16	176.82	534.66	156.735	2.5591	576	20.16%	24.0046	23.9954	5.31158
2025-07-12 15:00:45	灰度-45度-未知-3cm	82.16	142.16	445.2	138.011	2.55374	853	34.7%	35.5485	23.9954	12.4831
2025-07-12 15:00:49	灰度-45度-未知-3cm	79.32	130.81	406	128.847	2.49736	997	26.9%	41.5496	23.9954	8.15885
2025-07-12 15:00:53	灰度-45度-未知-3cm	79.32	142.16	463.15	140.772	2.69999	787	30.02%	32.7979	23.9954	9.98622
2025-07-12 15:00:58	灰度-45度-未知-3cm	79.32	135.61	428.98	132.633	2.57842	840	31.35%	35.0067	23.9954	10.8323
2025-07-12 15:01:02	灰度-45度-未知-3cm	82.16	137.87	368.81	133.349	2.07913	947	23.39%	39.4659	23.9954	6.62059
45度未知-5cm
2025-07-12 15:02:02	灰度-45度-未知-5cm	79.32	137.87	764.12	140.013	4.967	665	39.08%	27.7136	23.9954	15.3704
2025-07-12 15:02:07	灰度-45度-未知-5cm	79.32	128.26	9316.2	131.684	72.0168	622	42.1%	25.9216	23.9954	17.6799
2025-07-12 15:02:12	灰度-45度-未知-5cm	79.32	124.23	9436.67	131.757	75.3228	611	43.34%	25.4632	23.9954	18.3779
45度未知-7cm
2025-07-12 15:03:16	灰度-45度-未知-7cm	76.32	118.42	209.84	119.514	1.12751	1063	21.96%	44.3001	23.9954	6.3458
2025-07-12 15:03:21	灰度-45度-未知-7cm	76.32	118.42	327.76	119.975	2.12329	1193	15.76%	49.7178	23.9954	3.42532
2025-07-12 15:03:26	灰度-45度-未知-7cm	79.32	136.75	340.36	130.881	1.90888	1189	16.04%	49.5511	23.9954	3.14258
