# Supplementary material for: Surface acoustic wave-assisted swing-angle spray: from mechanism investigation to deposition characteristics and in vivo wound healing
Source: Royal Society of Chemistry journal article supplement (doi:10.1039/d5lc00964b), 2025-12-16
Supplement: d5lc00964b2.pdf [file d5lc00964b2.pdf]

## **Supplementary Information**

# **Surface Acoustic Wave-Assisted Swing-Angle Spray: From Mechanism Investigation to Deposition Characteristics and In Vivo Wound Healing**

Chenhui Gai<sup>a</sup>, Yu Gu<sup>a</sup>, Qutong Yang<sup>b</sup>, Suxiao Zhao<sup>a</sup>, Yizhan Ding<sup>a</sup>, Yulin Lei<sup>a</sup>,

Junlong Han<sup>c,\*</sup>, Hong Hu<sup>a,\*</sup>, Chen Fu<sup>b,\*</sup>

*a School of Mechanical Engineering and Automation, Harbin Institute of Technology,  
Shenzhen, 518055, China*

*b College of Physics and Optoelectronic Engineering, Shenzhen University, Shenzhen,  
518060, China*

*c School of Automotive & Transportation Engineering, Shenzhen Polytechnic  
University, Shenzhen, 518055, China*

\* Corresponding author

Email address: hanjunlong@szpu.edu.cn (Junlong Han), honghu@hit.edu.cn (Hong Hu), chenfu@szu.edu.cn (Chen Fu)

The file includes:

Fig. S1 to S7

Table. S1

Video S1 to S2

Data S1

## **Supplementary figure, video and data captions**

**Fig. S1.** The experimental setup of the SAW-SAS.

**Fig. S2.** Laser Doppler Vibrometer (LDV) measurement system.

**Fig. S3.** Frequency Response (S11) Spectrum of the SAW Device.

**Fig. S4.** Image processing of spray deposition characteristics.

**Fig. S5.** Spray deposition on water-sensitive paper when swing-angle at approximately  $5^{\circ}$ .

**Fig. S6.** Spray deposition on water-sensitive paper when swing-angle at approximately  $30^{\circ}$ .

**Fig. S7.** Spray deposition on water-sensitive paper when swing-angle at approximately  $45^{\circ}$ .

**Table. S1.** The standard deviation for all key parameters in Fig. 4(a)

**Video S1** Small swing-angle spray.

**Video S2** Large swing-angle spray.

**Data S1** SAW-SAS Deposition Characteristics.

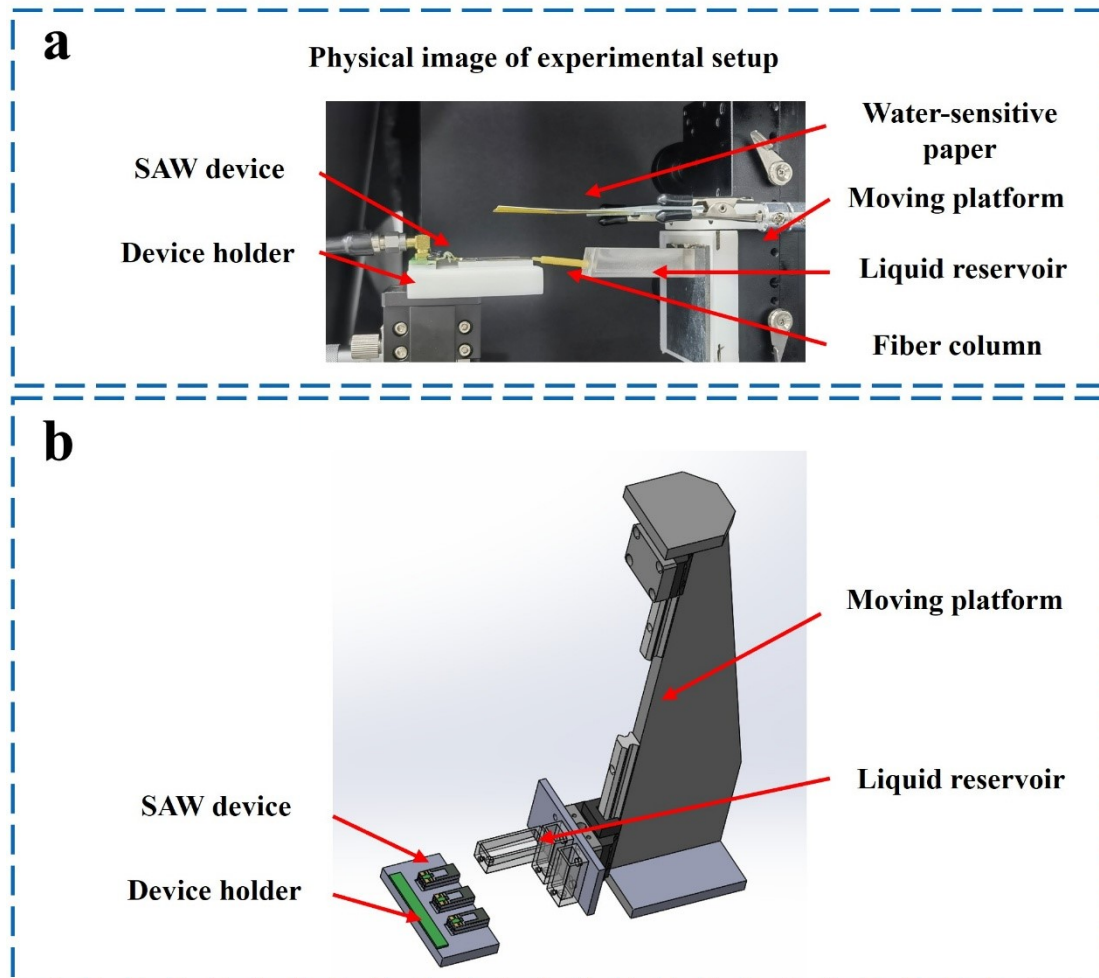

**Fig. S1.** The experimental setup of the SAW-SAS. (a) Physical image of experimental setup. (b) Schematic diagram of experimental setup.

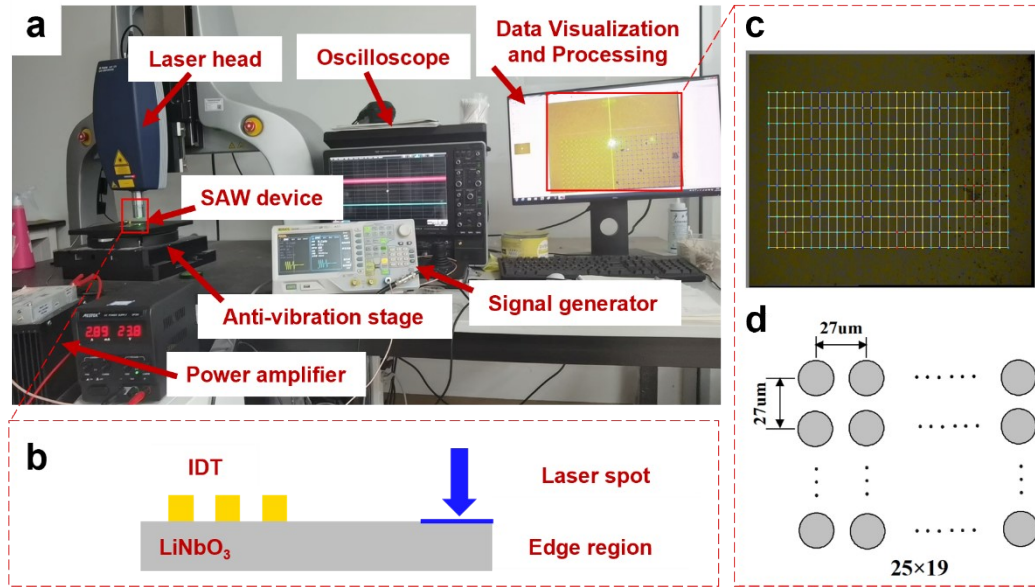

**Fig. S2.** Laser Doppler Vibrometer (LDV) measurement system. (a) Photograph of the experimental setup, integrating a SAW excitation module and a laser-based detection and analysis module. (b) Schematic illustrating the laser spot precisely focused on the device's edge region. (c) Micrograph of the device edge showing the  $650 \mu\text{m} \times 500 \mu\text{m}$  scanned grid. (d) Schematic of the  $25 \times 19$  scan point array with  $27 \mu\text{m}$  spacing.

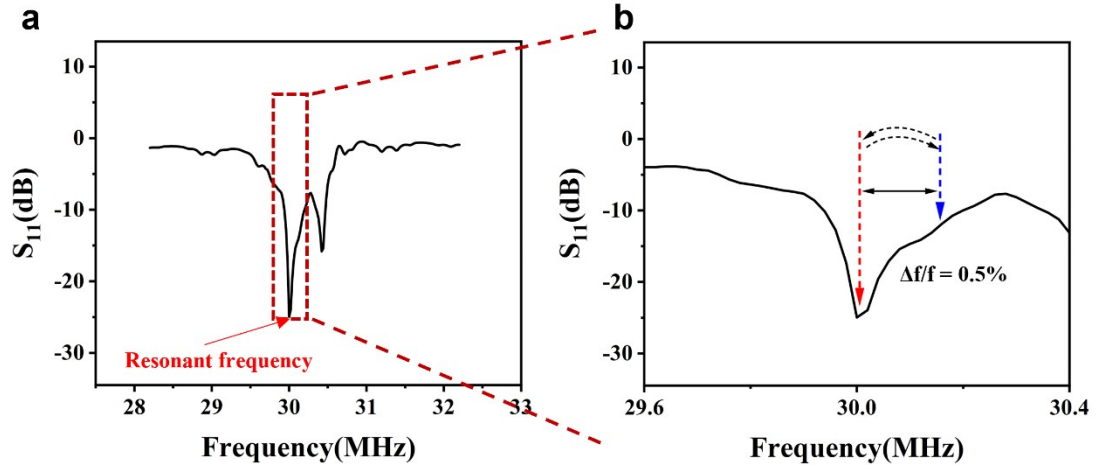

**Fig. S3.** Frequency Response (S<sub>11</sub>) Spectrum of the SAW Device. (a) S<sub>11</sub> (return loss) measurement showing a clear resonant frequency at approximately 30.0 MHz. (b) Magnified view of the resonant peak, illustrating the 0.5% relative frequency deviation range on the high-frequency (right) side of the peak, which is used for the SAW-SAS swing-angle modulation. The non-linear slope of this curve explains the non-uniform angle-to-frequency response shown in **Fig. 3(b)**.

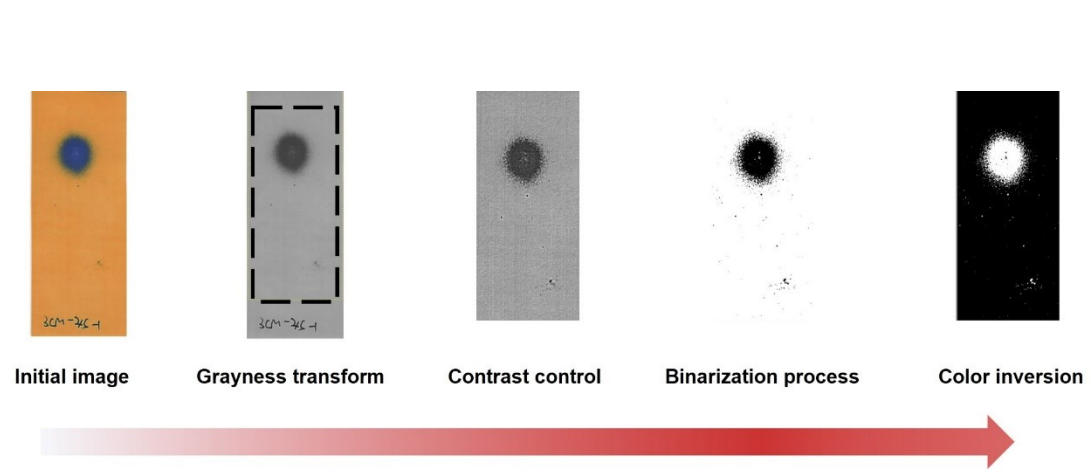

**Fig. S4.** Image processing of spray deposition characteristics.

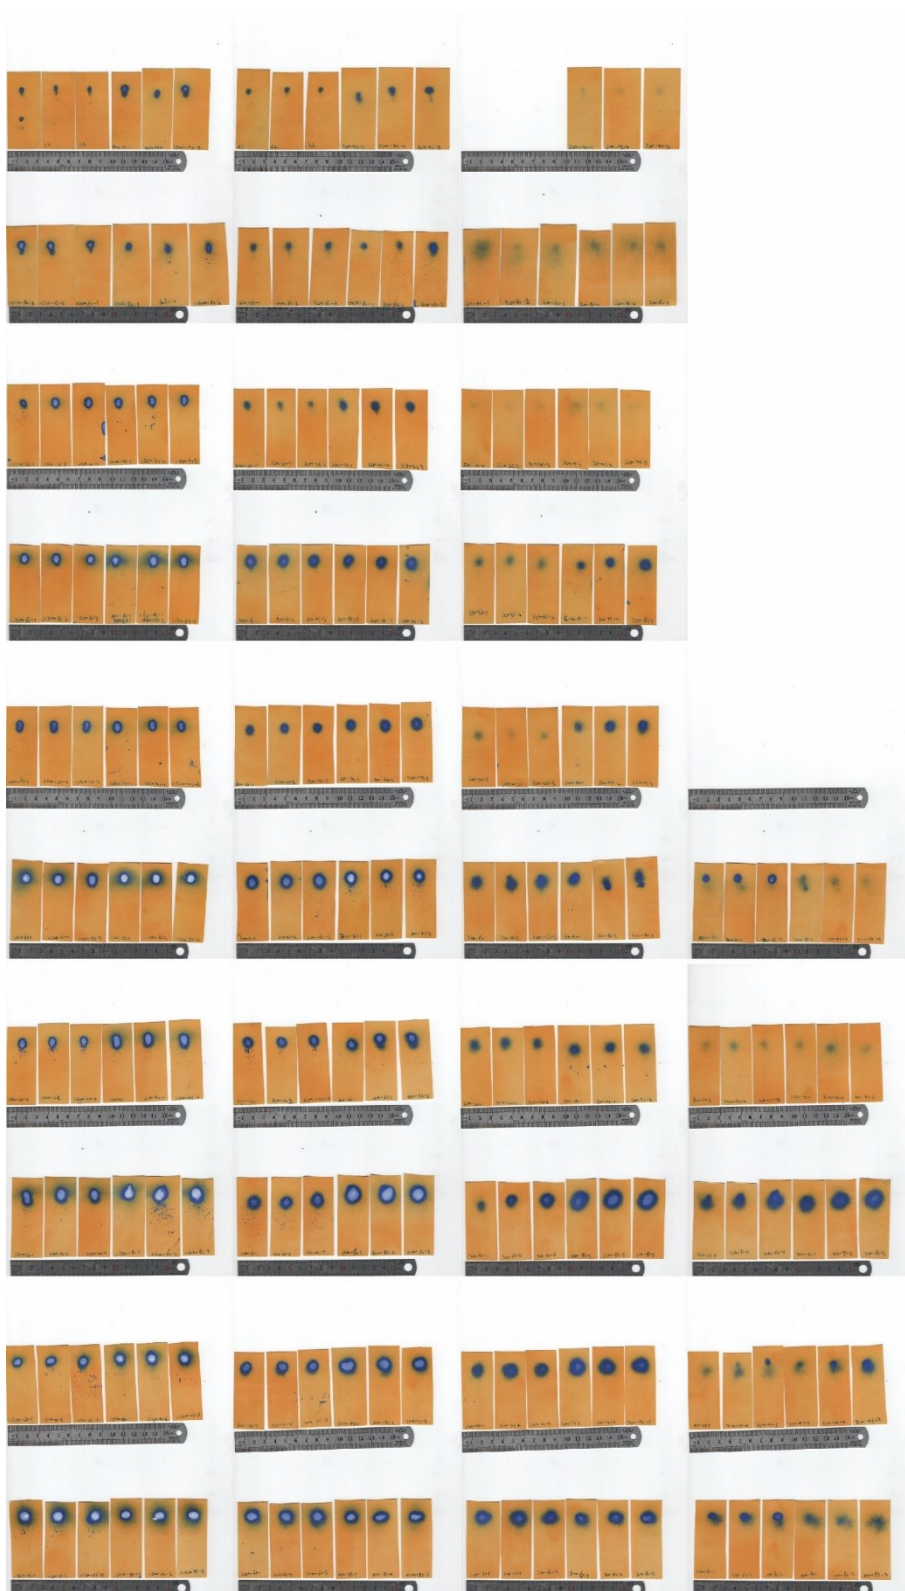

**Fig. S5.** Spray deposition on water-sensitive paper when swing-angle at approximately 5°.



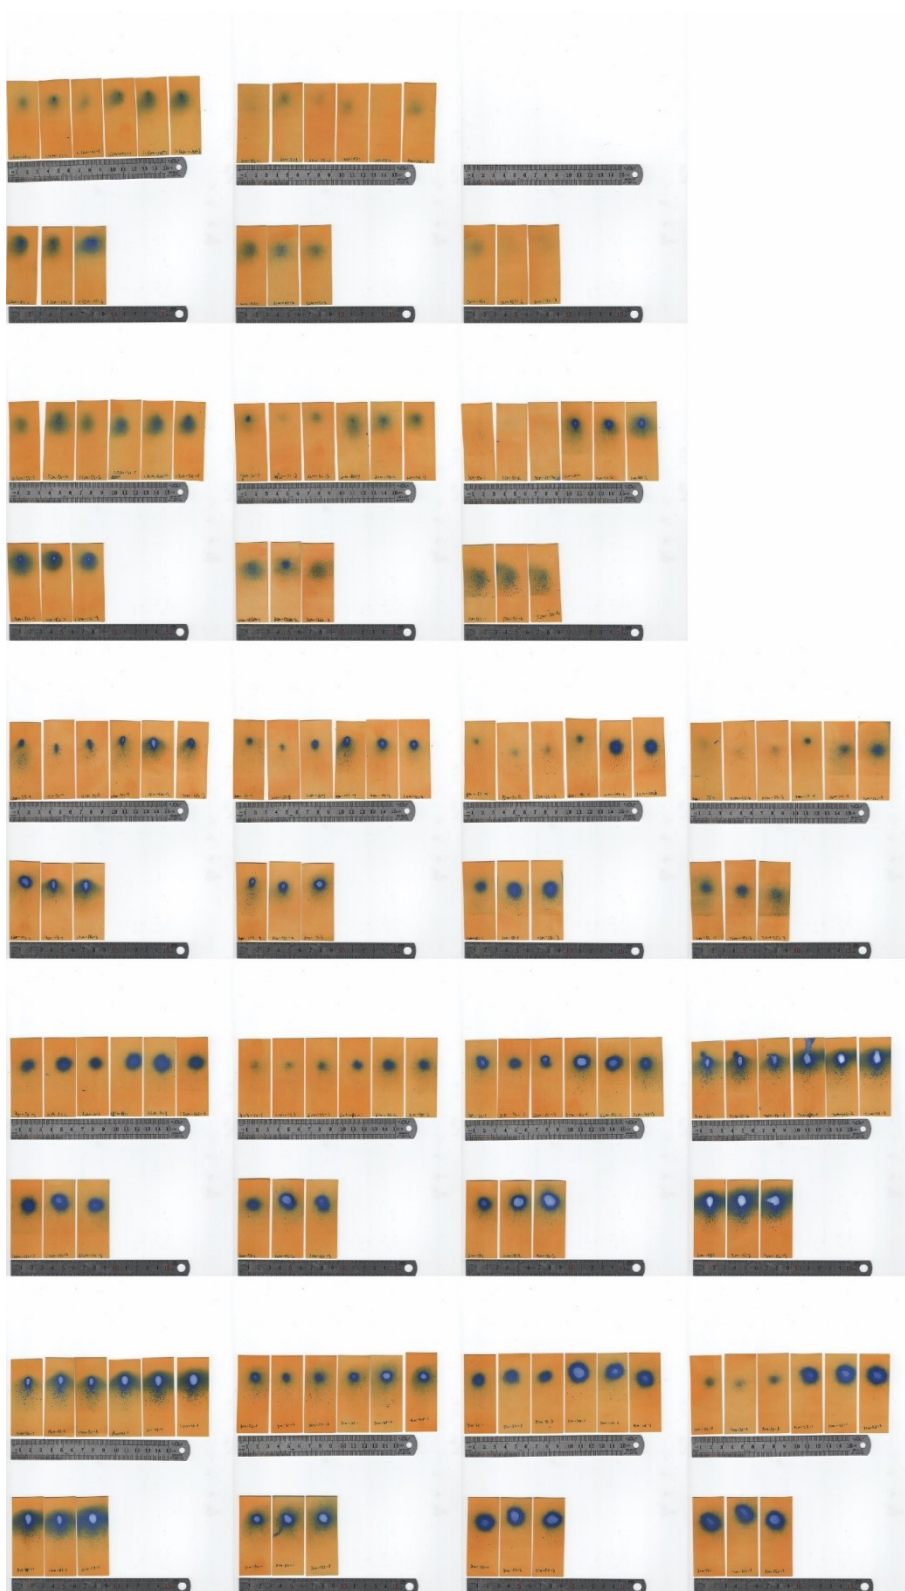

**Fig. S6.** Spray deposition on water-sensitive paper when swing-angle at approximately 30°.



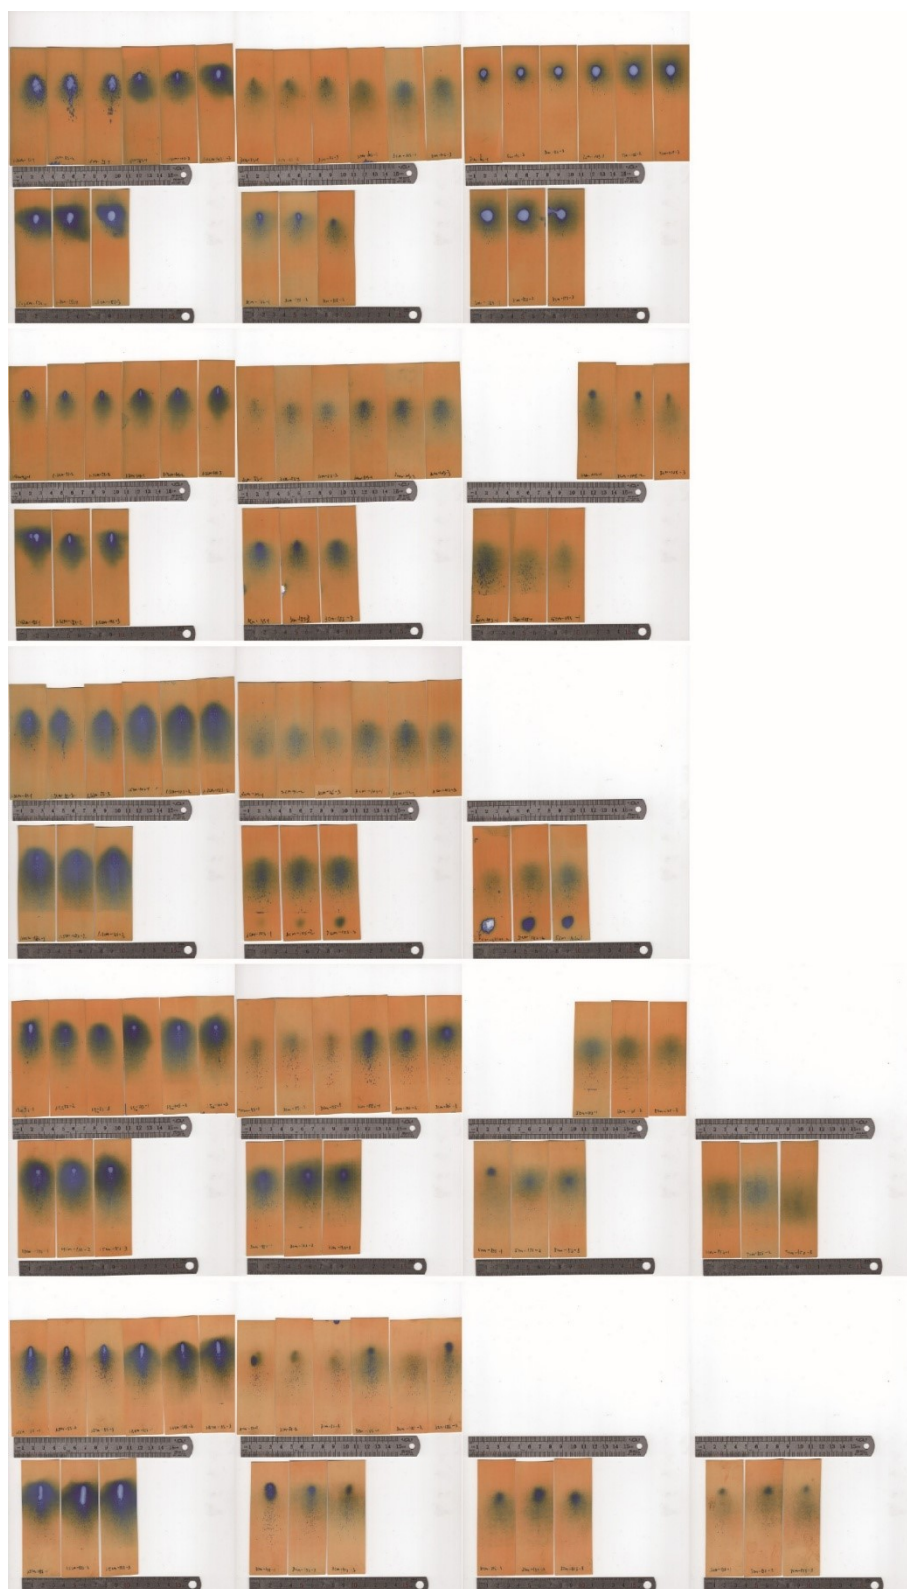

**Fig. S7.** Spray deposition on water-sensitive paper when swing-angle at approximately 45°.

**Table. S1.** The standard deviation for all key parameters in **Fig. 4(a)**

| Propagation | DV1   | SD   | VMD    | SD    | DV9     | SD      | NMD    | SD    | Coverage | SD    |
|-------------|-------|------|--------|-------|---------|---------|--------|-------|----------|-------|
| Angle (°)   | (μm)  | (μm) | (μm)   | (μm)  | (μm)    | (μm)    | (μm)   | (μm)  | (%)      | (%)   |
| 5           | 72.85 | 0.73 | 114.05 | 2.40  | 2389.12 | 214.93  | 119.52 | 5.63  | 5.39     | 1.05  |
|             | 73.13 | 2.05 | 109.86 | 6.57  | 3438.67 | 1246.10 | 119.18 | 8.92  | 9.69     | 3.82  |
|             | 73.94 | 1.37 | 119.13 | 3.72  | 3944.28 | 624.35  | 128.81 | 7.31  | 12.58    | 4.01  |
|             | 74.36 | 3.91 | 125.26 | 14.85 | 4453.49 | 361.93  | 130.09 | 14.15 | 16.53    | 2.49  |
|             | 74.36 | 3.06 | 116.58 | 12.71 | 4904.94 | 509.03  | 124.07 | 13.96 | 20.00    | 3.85  |
|             | 74.82 | 2.83 | 107.95 | 9.38  | 1499.13 | 146.27  | 111.50 | 13.02 | 6.97     | 2.71  |
| 30          | 74.89 | 1.39 | 115.75 | 3.02  | 2812.74 | 547.96  | 119.76 | 6.58  | 13.95    | 3.81  |
|             | 74.52 | 1.96 | 121.26 | 9.14  | 2987.24 | 732.77  | 123.50 | 8.17  | 11.98    | 2.19  |
|             | 74.54 | 3.40 | 117.58 | 21.05 | 2223.81 | 873.44  | 120.82 | 17.62 | 15.47    | 11.06 |
|             | 77.32 | 3.05 | 126.48 | 17.78 | 3554.51 | 415.60  | 129.21 | 15.19 | 30.57    | 3.15  |
|             | 77.65 | 1.23 | 122.03 | 5.75  | 2319.87 | 298.81  | 124.72 | 3.16  | 14.95    | 6.42  |
|             | 77.97 | 1.67 | 121.73 | 7.64  | 501.59  | 599.58  | 123.91 | 3.88  | 16.43    | 4.78  |
| 45          | 80.90 | 0.41 | 143.58 | 6.67  | 3236.15 | 192.97  | 137.84 | 5.39  | 22.53    | 4.26  |
|             | 80.85 | 1.29 | 148.82 | 9.82  | 3391.67 | 223.41  | 141.25 | 6.53  | 25.54    | 6.91  |
|             | 78.64 | 0.73 | 138.60 | 5.27  | 286.53  | 180.33  | 128.98 | 2.40  | 10.08    | 7.06  |
